# Supplementary material for: Synthesis of neutral nickel catalysts for ethylene polymerization ? the influence of ligand size on catalyst stabilityElectronic supplementary information (ESI) available: experimental protocol for (tmeda)Ni(Me)2 and compounds 3,4,7,8,9 and 10 and 1H-NMR magnetization transfer data for compound 7. See http://www.rsc.org/suppdata/cc/b3/b306701g/
Source: Royal Society of Chemistry journal article supplement (doi:10.1039/b306701g), 2003-01-01
Supplement: b306701g.doc [file b306701g.doc]

# Supplementary data

**Synthesis of neutral nickel catalysts for ethylene polymerization – the influence of ligand size on catalyst stability**

**Eric F. Connor, Todd R. Younkin, Jason I. Henderson, Andrew Waltman and Robert H. Grubbs***

*Division of Chemistry and Chemical Engineering, Arnold and Mabel Beckman Laboratories of Chemical Synthesis, California Institute of Technology, Pasadena, California 91125.*

**Supporting information.**

(1) Experimental section

(2) Crystal data and structure refinement for **8**.

(3) Crystal data and structure refinement for **9**.

(4) Crystal data and structure refinement for **7**.

(5) Crystal data and structure refinement for **10**.

**Experimental Section.**

All manipulations were carried out using standard Schlenk or glovebox techniques under nitrogen (N2) atmosphere. Unless otherwise noted, solvents were deoxygenated and dried by sparging with N2 gas, followed by passage through an activated alumina column. Diethyl ether, tetrahydrofuran, hexanes and benzene were typically tested with a standard purple solution of sodium bezophenone ketyl in tetrahydrofuran to confirm effective oxygen and moisture removal. Deuterated methylene chloride and benzene were purchased from Cambridge Isotope Laboratories, Inc. The solvents were distilled from CaH2 and degassed by repeated freeze pump thaw cycles prior to use. Elemental analysis was performed by Midwest Microlabs, 7212 N. Shadeland. Ave. Indianapolis, IN 46250. A Varian Mercury 300 MHz NMR Spectrometer and a Varian Inova-500 NMR spectrometer was used to record 1H and 13C NMR spectra unless otherwise stated. 1H and 13C NMR chemical shifts were referenced to residual solvent. X-ray diffraction experiments were performed in the Beckman Institute Crystallographic Facility on a Bruker Smart 1000 CCD diffractometer.

**Modified literature procedure for the the preparation for (tmeda)NiMe2:**[[1]](#footnote-2) (tmeda)NiMe2 was prepared by treatment of (tmeda)Ni(acac)2 with one equivalent of (tmeda)MgMe2 in diethyl ether at –20ºC. A modified isolation procedure was used and is now described. The yellow/brown solution was cooled from at –20º C to –70º C, causing the powdery yellow (tmeda)NiMe2 to precipitate. The brown solution was then decanted from the yellow precipitate. Another 20 mL of diethyl ether was added to the solid and the solution warmed to 0ºC for 10 minutes, redissolving the solid. The solution was then cooled to –70ºC, precipitating the (tmeda)NiMe2. This procedure was performed another two times to generate a yellow solid that was dried under reduced pressure (50-66% yield). 1H NMR and 13C NMR matched literature assignments. The product was stored in the glove box in a fridge (Note. (tmeda)NiMe2 is very sensitive to oxygen or water exposure and decomposes rapidly (1-2 minutes) at room temperature to black Ni(0)).

Preparation of *o*-(9-anthracenyl) salicylaldimine ligands (**3**,**4**).[[2]](#footnote-3) Synthesized in analogy to literature methods:.[[3]](#footnote-4)

***o-*Anthracenylanisole** (**11**): To a round bottomed flask was added 1.4 equivalents of magnesium turnings with respect to 2-bromoanisole. The flask, stir bar, and magnesium were flame dried under dynamic vacuum. The flask was charged with THF and a small iodine crystal is added. Once the solution becomes clear, 2-bromoanisole is added dropwise. The addition should be controlled to avoid overheating the reaction. Once the addition is complete, the mixture is stirred for an additional 4 hours. Anthrone (1 eq.) dissolved in THF is added to the grignard solution at 0ºC. The reaction is stirred at 0º C for two hours and then slowly allowed to warm to room temperature and left for 12 hours. After this time, 100 mL of concentrated HCl is added to the orange solution. The organic phase is separated, dried with MgSO4 and the solvent removed. The resulting yellow solid is recrystallized from toluene/hexanes (3:1 v/v). The resulting white to yellow solid is 2-anthracenyl anisole **9**. Yield 60-80%. 1H NMR (CD2Cl2, 25ºC): 4.53(s, 3H), 7.1-8.0 ppm (13H), 8.05 (d), 8.46 ppm (s, 1H). 13C NMR (CD2Cl2, 25ºC): 116.08, 121.13, 124.54, 125.91, 126.37, 125.67, 128.27, 128.99, 130.24, 130.45, 131.21, 132.02, 132.62, 154.29. Elemental Analysis (Calculated/Found): C 88.70 (88.62), H 5.67 (5.66), N 0.0 (0.00).

***o-*Anthracenylphenol** (**12**): Anthracenylanisole **11** is dissolved in CH2Cl2 and cooled to -78ºC. To this solution is added of BBr3 (1.2 eq.). The solution is allowed to stir and warm to room temperature over 4 hours. The reaction is stopped by the addition of water. The two phases are separated and the organic phase is washed with water and brine, then dried over MgSO4. The product was purified by column chromatography (80:20 hexanes:ethyl acetate). The yield is near quantitative. 1H NMR (CD2Cl2, 25º C):  4.66 ppm (s), 7.24-7.51 ppm (m), 7.6 (d), 8.06 ppm (d), 8.54 ppm (s). 13C NMR (CD2Cl2, 25º C): Peaks at  116.08, 121.13, 124.54, 125.91, 126.37, 125.67, 128.27, 128.99, 130.24, 130.45, 131.21, 132.02, 132.62, 154.29 ppm. Elemental Analysis (Calculated/Found): C 88.86 (88.29), H 5.22 (5.18), N 0.0 (0.00).

***o-*Anthracenylphenol tetrahydropyranyl ether** (**13**): Phenol **12** was dissolved in CH2Cl2 and 1.2 equivalents of dihydropyran is added, along with a catalytic amount of *p-*toluenesolfonic acid. The solution is stirred for 12 hours. To this solution is added NaOH solution (.1 M). The two phases are separated, and the organic phase is washed with brine and dried over MgSO4. The solvent is removed to give a yellow to white solid which can be recrystallized from hexanes to give a near quantitative yield. The NMR data is identical to the previously reported compound.2

**3*-*Anthracenylsalicylaldehyde** (**14**): Protected anthracenyl phenol (**13**) is dissolved in diethyl ether. To this solution is added 1.15 equivalents of BuLi at 15º C. A precipitate begins to form very soon after addition. The reaction is allowed to stir for 4 hours, then dimethylformamide (DMF, 1.2 eq.) is added to the brick red solution with precipitate. The solution become homogeneous. Water is added, (2 equivalents) and the reaction turns a light yellow. The two phases are separated. To the aqueous phase is treated with NaHCO3, then washed with ether. The organic phases are combined and washed with water and brine. The solution is dried with MgSO4 and the solvent is removed. The product (~90%) is carried on without further purification. Deprotection of the phenol is achieved by dissolving the compound in MeOH, adding catalytic *p-*toluenesulfonic acid and heating at reflux for 4 hours. *o*-Anthracenylsalicylaldehyde (**14**) is isolated in quantitative yield. The NMR data is identical to the previously reported compound.2

**2-Anthracen-9-yl-6-(phenyliminomethyl)phenol** (**3)**: *o-*Anthracenylsalicylaldehyde (**14**) is dissolved in MeOH and aniline (1.2 eq.) is added with a catalytic amount of *p-*toluenesulfonic acid. The solvent is removed to give an oil. Pentane is added to yield a yellow solid. Recrystallization from pentane gives the desired compound (>85% yield). 1H NMR (C6D6, 25º C): 6.85 (s, 2H), 6.87 (t, 1H, 3JHH = 7.2 Hz), 7.08-7.30 (m, 7H), 7.81 (s, 1H), 7.86 (dd, 2H, , 3JHH = 8.5 Hz, , 4JHH = 0.9 Hz), 7.96 (dd, 2H, , 3JHH = 8.7 Hz, 4JHH = 0.9 Hz), 8.26 (s, 1H), 13.48 (s, 1H). 13C NMR (C6D6, 25º C):  18.61, 118.97, 119.40, 125.24, 125.73, 127.18, 127.48, 127.82, 128.53, 128.56, 128.89, 131.15, 132.06, 132.38, 133.13, 136.87, 148.39, 160.43, 167.11. Elemental Analysis (Calculated/Found): C 85.09 (84.65), H 6.09 (5.63), N 3.25 (3.44).

**2-Anthracen-9-yl-6-((2,6-diisopropylphenyl)iminomethyl)phenol** (**4)**: Synthesized *via* the same procedure as **3**, using 2,6-diisopropylaniline. NMR data is identical to that previously reported.2

Ligand **2** was prepared from salicylaldehyde and the 2,6-diisopropylaniline condensed using a procedure similar to that used to generate **3**.

**(2-((2,6-disopropylphenyl)iminomethyl)phenoxide)NiMe(MeCN)** (**5**): In the glove box, salicylaldimine ligand **2** (0.024 g, 0.074 mmol) and (tmeda)Ni(CH3)2(0.016g, 0.73 mmol) were weighed into a sample vial. Anhydrous NCCD3 was added to dissolve both compounds, giving an orange colored solution. Bubbling was observed. 1H NMR (NCCD3, 300 MHz, 25º C) taken 30 minutes after reaction set up revealed that the ligand had coordinated to the nickel quantitatively. -1.40, 0.12 (s, CH3Ni, two isomers present), 1.08, 1.14, 1.37, 1.40 (d, CH(CH3)2), 3.68, 3.70 (septet, CH(CH3)2, 7-8 (m, aromatic).

**Bis(2-((2,6-disopropylphenyl)iminomethyl)phenoxide)Ni** (**8**): A solution of **2** (0.40 g, 11.4 mmol) in NCCH3 (3 mL) was added to a solution of (tmeda)Ni(CH3)2 (0.123 g, 6.00 mmol) in NCCH3 (3 mL). A color change from yellow to a deep red color was observed The resulting mixture was stirred for 2 hours at room temperature. Dark red crystals formed. The solvent was decanted and the remaining crystals were left under vacuum to remove residual solvent. Isolated yield: 20% with respect to ligand. 1H NMR (CD2Cl2, 300 MHz, 25º C): .22, 1.37 (d, 24H, 3JHH = 6.9 Hz CH(C*H*3)2), 4.48 (septet, 4H, 3JHH = 6.9 Hz CH(CH3)2, 6.9-7.3 (m, 14H, aromatic), 8.44 (s, 2H). Elemental Analysis (Calculated/Found): C 73.68 (75.58), H 7.16, (7.27), N 4.52 (4.63). The structure of **8** was confirmed by X-Ray crystallography. The X-ray diffraction data were collected by using a CCD area detector diffractometer with graphite-monochromated Mo K radiation (0.71073 Å). Unit cell parameters were determined by least-squares analysis of 25 automatically centered reflections in the range of 2.16º <  < 27.01º. Data was collected at 98 K. A total of 154074 reflections were collected, 11208 of which were independent. A set of 7057 reflections with Fo2 >2(Fo2) were observed. The structure was solved by direct methods using the SHELXS-97 program. Hydrogen atoms appeared in the difference Fourier map. They were unrestrained during refinement, and their Uiso values were fixed at 1.1 times the Ueq value of the attached atom. Refinement was full matrix least squares on F2 using SHELXL-97.

**Bis(2-Anthracen-9-yl-2-(6-phenyliminomethyl)phenoxide)Ni** (**9**): Crystals suitable for X-ray crystallographic structure determination were obtained from the reaction of 1 equivalent of ligand **3** (51 mg, FW = 373.45, 131 mol) with (tmeda)NiMe2 (29 mg, FW = 204.90, 137 mol, 1.05 eq.) in 3.0 mL of anhydrous acetonitrile. Isolated yield: 15 % with respect to ligand. Compound **9** was observed to have paramagnetic contributions, making characterization by NMR difficult. The structure of **6** was confirmed by X-ray analysis. Crystals were grown from a solution of **6** in methylene chloride at room temperature by the slow infusion of acetonitrile over a few days. The greenish yellow crystal used for data collection had dimensions 0.37 x 0.22 x 0.19 mm3. The X-ray diffraction data were collected by using a CCD area detector diffractometer with graphite-monochromated Mo K radiation (0.71073 Å). Unit cell parameters were determined by least-squares analysis of 25 automatically centered reflections in the range of 2.16º <  < 27.01º. Data was collected at 98 K. A total of 154074 reflections were collected, 11208 of which were independent. A set of 7057 reflections with Fo2 >2(Fo2) were observed. The structure was solved by direct methods using the SHELXS-97 program. Hydrogen atoms appeared in the difference Fourier map. Their were unrestrained during refinement, and their Uiso values were fixed at 1.1 times the Ueq value of the attached atom. Refinement was full matrix least squares on F2 using SHELXL-97.

**(2-Anthracen-9-yl-6-((2,6-diisopropylphenyl)iminomethyl)phenoxide)NiMe(MeCN)** (**7**): Crystals of suitable quality for X-ray analysis were obtained from the reaction of ligand **4** (60 mg, FW = 457.61, 131 mol) with (tmeda)NiMe2 (28 mg, FW = 204.90, 137 mol, 1.05 eq.) in 3.0 mL of anhydrous acetonitrile (~ 45 mM) upon standing overnight at room temperature. Isolated yield 80 % with respect to ligand. 1H NMR (CD2Cl2, 25º C): (M = Major; m = minor)  –1.45 (s 3H-M), -0.95 (s, 3H-M), 1.15 (d, 6H, 3JHH = 6.6 Hz-M), 1.18 (d, 6H, 3JHH = 6.6 Hz-m), 1.25 (d, 6H, 3JHH = 6.6 Hz-M), 1.28 (d, 6H, 3JHH = 6.6 Hz-m), 1.85 (s, 3H-m), 1.92 (s, 3H-M), 3.80 (sept, 2H, 3JHH = 6.6 Hz-M), 3.98 (sept, 2H, 3JHH = 6.6 Hz-M), ~6.60 (t, 2H, 3JHH = 6.6 Hz-M/m), 7.0-8.0 (m, 28 H-M/m), 8.4 (s, 2H-M/m). 13C NMR (C6D6, 25º C):  -2.4, 22.6, 25.6, 28.9, 114.2, 119.9, 121.1, 124.5, 124.7, 125.8, 127.3, 128.4, 129.0, 130.6, 130.8, 131.8, 133.5, 134.7, 137.4, 138.3, 140.7, 145.2, 146.4, 150.1, 165.2, 166.7. Elemental Analysis (Calculated/Found): C 75.67 (75.58), H 6.35, (6.46), N 4.90 (5.01).

Magnetization Transfer Experiment: Nickel complex **7** (0.024 mmol) was dissolved in CD2Cl2 (600 L) in an NMR tube, and the resulting solution was allowed to thermally equilibrate in the NMR probe at the chosen temperature (between -20º C and 10º C). The major Ni-C*H*3 resonance ( -0.95 ppm) was selectively inverted using a DANTE pulse sequence[[4]](#footnote-5) and after variable mixing times (between 0.00003 and 50 s), a non-selective 90º pulse was applied and a FID recorded. 1H decoupling was applied during the 90º pulse. Spectra were collected as 1, 4 or 8 transients. The peak heights of the major and minor Ni-C*H*3 resonance at variable mixing times were analyzed by software[[5]](#footnote-6) to obtain the exchange rate of the methyl from the cis and trans positions.

***Figure*** : 1H NMR magnetization transfer of CH3-Ni signal on structure **7** at 0 °C.

**Bis(2-Anthracen-9-yl-6-((2,6-diisopropylphenyl)iminomethyl)phenoxide)Ni** (**10**): The addition of 2 equivalents of the sodium salt of **4** (prepared by treatment of **4** with NaH in THF)to Ni(PPh3)2Br2 generates a reaction medium that changes to an orange color. Upon concentration the color darkens to a greenish brown. The recovered material contains unreacted Ni(PPh3)2Cl2 and **8** (Isolated yield 10% with respect to ligand) whose structure was confirmed by X-Ray crystallographic analysis. Compound **10** had paramagnetic contributions, thus making characterization by NMR difficult. Crystals suitable for X-ray structure determination were grown from a solution of **8** in CH2Cl2 at room temperature by the slow infusion of acetonitrile over a few days. The greenish yellow crystal used for data collection had dimensions 0.37 x 0.22 x 0.19 mm3. The X-ray diffraction data were collected by using a CCD area detector diffractometer with graphite-monochromated Mo K radiation (0.71073 Å). Unit cell parameters were determined by least-squares analysis of 25 automatically centered reflections in the range of 2.16º <  < 27.01º. Data was collected at 98 K. A total of 154074 reflections were collected, 11208 of which were independent. A set of 7057 reflections with Fo2 >2(Fo2) were observed. The structure was solved by direct methods using the SHELXS-97 program. Hydrogen atoms appeared in the difference Fourier map. Their were unrestrained during refinement, and their Uiso values were fixed at 1.1 times the Ueq value of the attached atom. Refinement was full matrix least squares on F2 using SHELXL-97.

|  | **8** | **9** | **7** | **10** |  |
| --- | --- | --- | --- | --- | --- |
| Empirical Formula | C38H44N2NiO2 | C60H52N4Ni O2 | C36H36N2NiO | C66H60N2NiO2· 2(CH3CN) |  |
| Formula Weight | 619.46 | 919.77 | 571.38 | 971.91·(82.06) |  |
| Crystallization Solvent | CH3CN | CH2Cl2/ CH3CN | Acetonitrile | CH3CN |  |
| Crystal Habit | Rhomboid | Needle | Blade | Thin chunk |  |
| Crystal Color | Olive Green | Greenish-yellow | Dichroic yellow/brown | Dark Brown |  |
| Crystal Dimensions (mm3) | 0.37 x 0.27 x 0.185 | 0.37 x 0.22 x 0.19 | 0.36 x 0.22 x 0.06 | 0.259 x 0.185 x 0.148 |  |
| Wavelength | 0.71073 Å MoK | 0.71073 Å MoK | 0.71073 Å MoK | 0.71073 Å MoK |  |
| Data Collection Temperature (K) | 93(2) | 98(2) | 98(2) | 93(2) |  |
| Unit Cell Dimensions (Å) | a=8.0050(5) b=10.1054(6) c=11.0123(7) | a=17.8013(6) b=19.2789(6) c=27.0247(9) | a=18.0982(13) b=14.4000(10) c=22.3830(16) | a=10.8701(8) b=28.890(2) c=18.3122(14) |  |
| Unit Cell Dimensions (°) | =113.5190(10) =97.4260(10) =97.6730(10) | = 90  = 90   = 90 | = 90  = 90   = 90 | = 97.8390(10) |  |
| Volume (Å3) | 793.01(8) | 9274.6(5) | 5833.3(7) | 5697.0(7) |  |
| Z | 1 | 8 | 8 | 4 |  |
| Crystal System | Triclinic | Orthorhombic | Orthorhombic | Monoclinic |  |
| Space Group | P-1 | Pbca | Pbca | P21/c |  |
| Density (Calculated) Mg/m3 | 1.297 | 1.317 | 1.301 | 1.229 |  |
| Data/ Restraints/ Parameters | 3382/ 0/ 284 | 11208/ 0/ 812 | 4213 / 0 / 505 | 13770 / 15 / 901 |  |
| Goodness-of-fit (GOF) on F2 | 2.406 | 1.805 | 1.913 | 1.499 |  |
| Final R Indices  [I > 2(I)] | 3260 reflections  R1=0.0288  *w*R2=0.0711 | 7057 reflections  R1=0.0439 *w*R2=0.0566 | 4213 reflections  R1=0.0287  *w*R2=0.0518 | 8132 reflections  R1=0.0499  *w*R2=0.0778 |  |
| R Indices (All Data) | R1=0.0297  *w*R2=0.0713 | R1=0.0833  *w*R2=0.0589 | R1=0.0387  *w*R2=0.0527 | R1=0.0985  *w*R2=0.0818 |  |

**X-Ray Analysis of**

**(H,HSal)2Ni 8 (CCDC No. 162674)**

**Table 1. Crystal data and structure refinement for 8 (CCDC No. 162674).**

Empirical formula C38H44N2NiO2

Formula weight 619.46

Crystallization Solvent Acetonitrile

Crystal Habit Rhomboid

Crystal size 0.370 x 0.270 x 0.185 mm3

Crystal color Olive green

# Data Collection

Preliminary Photos None

Type of diffractometer CCD area detector

Wavelength 0.71073 Å MoKa

Data Collection Temperature 93 K

 range for 7378 reflections used

in lattice determination 2.24 to 27.73°

Unit cell dimensions a = 8.0050(5) Å a= 113.5190(10)°

b = 10.1054(6) Å b= 97.4260(10)°

c = 11.0123(7) Å g = 97.6730(10)°

Volume 793.01(8) Å3

Z 1

Crystal system Triclinic

Space group P-1

Density (calculated) 1.297 Mg/m3

F(000) 330

Data collection program Bruker SMART

 range for data collection 2.06 to 27.73°

Completeness to  = 27.73° 90.5 %

Index ranges -9  h  9, -12  k  12, -14  l  14

Data collection scan type  scans at 4  settings

Data reduction program Bruker SAINT v. 6.2

Reflections collected 8648

Independent reflections 3382 [Rint= 0.0346]

Absorption coefficient 0.648 mm-1

Absorption correction None

**Table 1 (cont.)**

# Structure Solution and Refinement

Structure solution program SHELXS-97 (Sheldrick, 1990)

Primary solution method Direct methods

Secondary solution method Direct methods

Hydrogen placement Difference Fourier map

Structure refinement program SHELXL-97 (Sheldrick, 1997)

Refinement method Full matrix least-squares on F2

Data / restraints / parameters 3382 / 0 / 284

Treatment of hydrogen atoms Unrestrained

Goodness-of-fit on F2 2.406

Final R indices [I>2s(I), 3260 reflections] R1 = 0.0288, *w*R2 = 0.0711

R indices (all data) R1 = 0.0297, *w*R2 = 0.0713

Type of weighting scheme used Sigma

Weighting scheme used *w*=1/2(Fo2)

Max shift/error 0.000

Average shift/error 0.000

Largest diff. peak and hole 0.471 and -0.267 e.Å-3

# Special Refinement Details

Refinement of F2 against ALL reflections. The weighted R-factor (*w*R) and goodness of fit (S) are based on F2, conventional R-factors (R) are based on F, with F set to zero for negative F2. The threshold expression of F2 > 2( F2) is used only for calculating R-factors(gt) etc. and is not relevant to the choice of reflections for refinement. R-factors based on F2 are statistically about twice as large as those based on F, and R-factors based on ALL data will be even larger.

All esds (except the esd in the dihedral angle between two l.s. planes) are estimated using the full covariance matrix. The cell esds are taken into account individually in the estimation of esds in distances, angles and torsion angles; correlations between esds in cell parameters are only used when they are defined by crystal symmetry. An approximate (isotropic) treatment of cell esds is used for estimating esds involving l.s. planes.

**Table 2. Atomic coordinates ( x 104) and equivalent isotropic displacement parameters (Å2x 103) for 5 (CCDC No. 162674). U(eq) is defined as the trace of the orthogonalized Uij tensor.**

________________________________________________________________________________

x y z U**eq**

________________________________________________________________________________

Ni 5000 5000 5000 11(1)

O 5996(1) 3478(1) 4060(1) 16(1)

N 5462(1) 4733(1) 6623(1) 12(1)

C(1) 6502(2) 2459(1) 4384(1) 13(1)

C(2) 7057(2) 1300(2) 3392(2) 17(1)

C(3) 7594(2) 195(2) 3675(2) 18(1)

C(4) 7620(2) 188(2) 4950(2) 19(1)

C(5) 7092(2) 1305(2) 5926(2) 17(1)

C(6) 6532(2) 2460(1) 5671(1) 13(1)

C(7) 6067(2) 3635(1) 6727(1) 13(1)

C(8) 5171(2) 5821(1) 7877(1) 13(1)

C(9) 3735(2) 5499(1) 8398(1) 15(1)

C(10) 3521(2) 6590(2) 9609(1) 17(1)

C(11) 4663(2) 7939(2) 10252(2) 19(1)

C(12) 6048(2) 8235(2) 9706(2) 18(1)

C(13) 6331(2) 7182(1) 8500(1) 15(1)

C(14) 2428(2) 4046(2) 7646(2) 18(1)

C(15) 1258(2) 4034(2) 6426(2) 26(1)

C(16) 1350(2) 3664(2) 8558(2) 24(1)

C(17) 7878(2) 7518(2) 7921(2) 18(1)

C(18) 7925(2) 8935(2) 7712(2) 26(1)

C(19) 9548(2) 7598(2) 8810(2) 28(1)

________________________________________________________________________________

**Table 3. Selected bond lengths [Å] and angles [°] for 8 (CCDC No. 162674).**

_______________________________________________________________________________

Ni-O 1.8285(9)

Ni-O#1 1.8285(9)

Ni-N 1.9087(11)

Ni-N#1 1.9087(11)

O-Ni-O#1 180.0

O-Ni-N 93.03(4)

O#1-Ni-N 86.97(4)

O-Ni-N#1 86.97(4)

O#1-Ni-N#1 93.03(4)

N-Ni-N#1 180.

_______________________________________________________________________________

Symmetry transformations used to generate equivalent atoms:

#1 -x+1,-y+1,-z+1

**Table 4. Bond lengths [Å] and angles [°] for 8 (CCDC No. 162674).**

_______________________________________________________________________________

Ni-O 1.8285(9)

Ni-O#1 1.8285(9)

Ni-N 1.9087(11)

Ni-N#1 1.9087(11)

O-C(1) 1.3107(15)

N-C(7) 1.3074(16)

N-C(8) 1.4528(16)

C(1)-C(6) 1.4147(19)

C(1)-C(2) 1.4159(18)

C(2)-C(3) 1.3785(19)

C(2)-H(2) 0.955(15)

C(3)-C(4) 1.404(2)

C(3)-H(3) 0.903(16)

C(4)-C(5) 1.373(2)

C(4)-H(4) 0.967(18)

C(5)-C(6) 1.4187(18)

C(5)-H(5) 0.959(15)

C(6)-C(7) 1.4242(18)

C(7)-H(7) 0.967(16)

C(8)-C(13) 1.4019(19)

C(8)-C(9) 1.4059(19)

C(9)-C(10) 1.3998(19)

C(9)-C(14) 1.528(2)

C(10)-C(11) 1.387(2)

C(10)-H(10) 0.932(16)

C(11)-C(12) 1.381(2)

C(11)-H(11) 0.897(16)

C(12)-C(13) 1.4003(19)

C(12)-H(12) 0.949(17)

C(13)-C(17) 1.5235(19)

C(14)-C(15) 1.531(2)

C(14)-C(16) 1.5319(19)

C(14)-H(14) 0.956(14)

C(15)-H(15A) 0.945(19)

C(15)-H(15B) 0.969(17)

C(15)-H(15C) 0.968(18)

C(16)-H(16A) 0.972(17)

C(16)-H(16B) 0.989(18)

C(16)-H(16C) 0.972(18)

C(17)-C(19) 1.524(2)

C(17)-C(18) 1.5345(19)

C(17)-H(17) 0.957(17)

C(18)-H(18A) 1.009(18)

C(18)-H(18B) 0.97(2)

C(18)-H(18C) 0.969(18)

C(19)-H(19A) 0.977(17)

C(19)-H(19B) 1.03(2)

C(19)-H(19C) 0.955(19)

O-Ni-O#1 180.0

O-Ni-N 93.03(4)

O#1-Ni-N 86.97(4)

O-Ni-N#1 86.97(4)

O#1-Ni-N#1 93.03(4)

N-Ni-N#1 180.0

C(1)-O-Ni 130.01(9)

C(7)-N-C(8) 114.96(11)

C(7)-N-Ni 125.34(9)

C(8)-N-Ni 119.69(8)

O-C(1)-C(6) 123.54(12)

O-C(1)-C(2) 118.18(12)

C(6)-C(1)-C(2) 118.28(12)

C(3)-C(2)-C(1) 120.63(13)

C(3)-C(2)-H(2) 121.3(9)

C(1)-C(2)-H(2) 118.0(9)

C(2)-C(3)-C(4) 121.31(13)

C(2)-C(3)-H(3) 118.1(10)

C(4)-C(3)-H(3) 120.6(10)

C(5)-C(4)-C(3) 118.98(13)

C(5)-C(4)-H(4) 119.0(11)

C(3)-C(4)-H(4) 122.0(11)

C(4)-C(5)-C(6) 121.26(13)

C(4)-C(5)-H(5) 120.9(9)

C(6)-C(5)-H(5) 117.8(9)

C(1)-C(6)-C(5) 119.54(12)

C(1)-C(6)-C(7) 120.75(11)

C(5)-C(6)-C(7) 119.67(12)

N-C(7)-C(6) 126.27(12)

N-C(7)-H(7) 116.8(9)

C(6)-C(7)-H(7) 116.9(9)

C(13)-C(8)-C(9) 122.60(12)

C(13)-C(8)-N 117.70(12)

C(9)-C(8)-N 119.68(12)

C(10)-C(9)-C(8) 117.13(13)

C(10)-C(9)-C(14) 121.45(12)

C(8)-C(9)-C(14) 121.37(12)

C(11)-C(10)-C(9) 121.28(13)

C(11)-C(10)-H(10) 118.9(10)

C(9)-C(10)-H(10) 119.8(10)

C(12)-C(11)-C(10) 120.35(13)

C(12)-C(11)-H(11) 118.9(10)

C(10)-C(11)-H(11) 120.7(10)

C(11)-C(12)-C(13) 120.85(14)

C(11)-C(12)-H(12) 119.7(10)

C(13)-C(12)-H(12) 119.5(10)

C(12)-C(13)-C(8) 117.77(13)

C(12)-C(13)-C(17) 120.19(13)

C(8)-C(13)-C(17) 122.03(12)

C(9)-C(14)-C(15) 111.35(12)

C(9)-C(14)-C(16) 113.14(13)

C(15)-C(14)-C(16) 110.38(13)

C(9)-C(14)-H(14) 105.7(9)

C(15)-C(14)-H(14) 109.0(9)

C(16)-C(14)-H(14) 107.0(8)

C(14)-C(15)-H(15A) 111.3(11)

C(14)-C(15)-H(15B) 111.0(10)

H(15A)-C(15)-H(15B) 107.7(14)

C(14)-C(15)-H(15C) 112.2(11)

H(15A)-C(15)-H(15C) 109.3(15)

H(15B)-C(15)-H(15C) 105.1(14)

C(14)-C(16)-H(16A) 111.4(10)

C(14)-C(16)-H(16B) 109.0(10)

H(16A)-C(16)-H(16B) 106.1(14)

C(14)-C(16)-H(16C) 110.7(10)

H(16A)-C(16)-H(16C) 106.5(14)

H(16B)-C(16)-H(16C) 113.1(14)

C(13)-C(17)-C(19) 110.84(12)

C(13)-C(17)-C(18) 111.98(12)

C(19)-C(17)-C(18) 110.84(13)

C(13)-C(17)-H(17) 107.7(10)

C(19)-C(17)-H(17) 107.7(10)

C(18)-C(17)-H(17) 107.5(10)

C(17)-C(18)-H(18A) 109.8(10)

C(17)-C(18)-H(18B) 110.0(11)

H(18A)-C(18)-H(18B) 108.8(15)

C(17)-C(18)-H(18C) 110.6(10)

H(18A)-C(18)-H(18C) 110.4(14)

H(18B)-C(18)-H(18C) 107.2(15)

C(17)-C(19)-H(19A) 112.2(10)

C(17)-C(19)-H(19B) 110.3(11)

H(19A)-C(19)-H(19B) 109.3(15)

C(17)-C(19)-H(19C) 110.5(11)

H(19A)-C(19)-H(19C) 108.8(15)

H(19B)-C(19)-H(19C) 105.4(15

_______________________________________________________________________________

Symmetry transformations used to generate equivalent atoms:

#1 -x+1,-y+1,-z+1

**Table 5. Anisotropic displacement parameters (Å2x 104** **) for 8 (CCDC No. 162674). The anisotropic displacement factor exponent takes the form: -2p2** **[ h2** **a*2U 11 + ... + 2 h k a* b* U12 ]**

______________________________________________________________________________

U11 U22 U33 U23 U13 U12

______________________________________________________________________________

Ni 152(2) 99(1) 97(1) 42(1) 32(1) 45(1)

O 235(6) 144(5) 115(5) 59(4) 51(4) 87(4)

N 140(6) 105(5) 108(6) 35(5) 27(5) 23(5)

C(1) 109(7) 109(6) 146(7) 46(6) 6(6) 14(5)

C(2) 200(8) 158(7) 146(8) 52(6) 54(6) 47(6)

C(3) 206(8) 133(7) 190(8) 31(6) 65(7) 72(6)

C(4) 204(8) 143(7) 253(8) 107(6) 48(7) 65(6)

C(5) 180(8) 156(7) 180(8) 90(6) 43(6) 39(6)

C(6) 113(7) 119(6) 152(7) 61(6) 14(6) 10(5)

C(7) 131(7) 147(7) 130(7) 72(6) 20(6) 16(6)

C(8) 173(7) 133(6) 84(7) 51(6) 9(6) 59(6)

C(9) 167(7) 150(6) 136(7) 74(6) 22(6) 57(6)

C(10) 187(8) 217(7) 150(7) 88(6) 63(6) 86(6)

C(11) 252(8) 187(7) 107(7) 14(6) 32(6) 100(6)

C(12) 215(8) 135(7) 151(8) 26(6) -5(6) 33(6)

C(13) 168(7) 145(6) 123(7) 61(6) 1(6) 41(6)

C(14) 184(8) 150(7) 196(8) 59(6) 80(6) 43(6)

C(15) 221(9) 294(9) 213(9) 96(7) 21(7) -51(8)

C(16) 256(9) 220(8) 283(9) 139(7) 118(8) 59(7)

C(17) 201(8) 140(7) 149(8) 35(6) 22(6) 2(6)

C(18) 243(9) 245(8) 326(10) 179(8) 46(8) 16(7)

C(19) 203(9) 360(10) 343(10) 224(9) 62(8) 70(7)

______________________________________________________________________________

**Table 6. Hydrogen coordinates ( x 104) and isotropic displacement parameters (Å2x 10** **3) for 5 (CCDC No. 162674).**

________________________________________________________________________________

x y z U**iso**

________________________________________________________________________________

H(2) 7036(19) 1304(15) 2525(16) 16(4)

H(3) 7919(19) -536(17) 3013(16) 20(4)

H(4) 7990(20) -584(19) 5158(19) 37(5)

H(5) 7125(19) 1345(15) 6814(16) 19(4)

H(7) 6250(19) 3639(16) 7614(16) 16(4)

H(10) 2570(20) 6430(16) 9975(16) 19(4)

H(11) 4480(20) 8650(17) 11004(16) 20(4)

H(12) 6810(20) 9168(18) 10145(17) 28(5)

H(14) 3091(18) 3300(15) 7336(15) 12(4)

H(17) 7780(20) 6721(18) 7053(17) 27(4)

H(15A) 1900(20) 4208(19) 5825(18) 36(5)

H(16A) 580(20) 4346(18) 8864(17) 27(4)

H(18A) 8960(20) 9117(18) 7321(17) 31(5)

H(19A) 10560(20) 7816(18) 8458(17) 30(4)

H(15B) 580(20) 4791(18) 6708(16) 23(4)

H(16B) 600(20) 2680(20) 8029(18) 33(5)

H(18B) 6890(30) 8841(19) 7092(19) 41(5)

H(19B) 9660(20) 8380(20) 9780(20) 40(5)

H(15C) 420(20) 3120(20) 5939(18) 36(5)

H(16C) 2090(20) 3736(18) 9366(18) 28(5)

H(18C) 7960(20) 9770(20) 8558(19) 33(5)

H(19C) 9540(20) 6690(20) 8891(18) 39(5)

________________________________________________________________________________

**X-Ray Diffraction Analysis of

(Anthr,HSalPh)2Ni(tmeda) 9 (CCDC 161495).**

**Table 1. Crystal data and structure refinement for 9 (CCDC 161495).**

Empirical formula C60H52N4O2Ni

Formula weight 919.77

Crystallization Solvent CH2Cl2/CH3C≡N

Crystal Habit Needle

Crystal size 0.37 x 0.22 x 0.19 mm3

Crystal color Greenish yellow

# Data Collection

Preliminary Photos Rotation

Type of diffractometer CCD area detector

Wavelength 0.71073 Å MoKa

Data Collection Temperature 98(2) K

q range for 33100 reflections used

in lattice determination 2.16 to 27.01°

Unit cell dimensions a = 17.8013(6) Å

b = 19.2789(6) Å

c = 27.0247(9) Å

Volume 9274.6(5) Å3

Z 8

Crystal system Orthorhombic

Space group Pbca

Density (calculated) 1.317 Mg/m3

F(000) 3872

Data collection program Bruker SMART

q range for data collection 1.89 to 28.59°

Completeness to q = 28.59° 94.4 %

Index ranges -23 ≤ h ≤ 22, -25 ≤ k ≤ 25, -36 ≤ l ≤ 36

Data collection scan type  scans at 6  settings

Data reduction program Bruker SAINT v6.2

Reflections collected 154074

Independent reflections 11208 [Rint= 0.0780]

Absorption coefficient 0.469 mm-1

Absorption correction None

Max. and min. transmission 0.9183 and 0.8471

**Table 1 (cont.)**

# Structure Solution and Refinement

Structure solution program SHELXS-97 (Sheldrick, 1990)

Primary solution method Direct methods

Secondary solution method Difference Fourier map

Hydrogen placement Difference Fourier map

Structure refinement program SHELXL-97 (Sheldrick, 1997)

Refinement method Full matrix least-squares on F2

Data / restraints / parameters 11208 / 0 / 812

Treatment of hydrogen atoms Unrestrained

Goodness-of-fit on F2 1.805

Final R indices [I>2s(I), 7057 reflections] R1 = 0.0439, *w*R2 = 0.0566

R indices (all data) R1 = 0.0833, *w*R2 = 0.0589

Type of weighting scheme used Sigma

Weighting scheme used *w*=1/2(Fo2)

Max shift/error 0.005

Average shift/error 0.000

Largest diff. peak and hole 1.016 and -0.510 e.Å-3

**Special Refinement Details**

Refinement of F2 against ALL reflections. The weighted R-factor (*w*R) and goodness of fit (S) are based on F2, conventional R-factors (R) are based on F, with F set to zero for negative F2. The threshold expression of F2 > 2( F2) is used only for calculating R-factors(gt) etc. and is not relevant to the choice of reflections for refinement. R-factors based on F2 are statistically about twice as large as those based on F, and R-factors based on ALL data will be even larger.

All esds (except the esd in the dihedral angle between two l.s. planes) are estimated using the full covariance matrix. The cell esds are taken into account individually in the estimation of esds in distances, angles and torsion angles; correlations between esds in cell parameters are only used when they are defined by crystal symmetry. An approximate (isotropic) treatment of cell esds is used for estimating esds involving l.s. planes.

**Table 2. Atomic coordinates ( x 104) and equivalent isotropic displacement parameters (Å2x 103) for 9 (CCDC 161495). U(eq) is defined as the trace of the orthogonalized Uij tensor.**

________________________________________________________________________________

x y z U**eq**

________________________________________________________________________________

Ni(1) 7254(1) 1538(1) 3826(1) 33(1)

O(1) 8132(1) 1583(1) 4284(1) 34(1)

O(2) 6391(1) 1621(1) 3356(1) 36(1)

N(1) 6521(1) 992(1) 4311(1) 33(1)

N(2) 7739(1) 616(1) 3524(1) 36(1)

N(3) 6939(1) 2560(1) 4172(1) 41(1)

N(4) 7821(1) 2214(1) 3272(1) 44(1)

C(1) 5819(1) 870(1) 4214(1) 34(1)

C(2) 5408(1) 1010(1) 3768(1) 32(1)

C(3) 4681(1) 730(1) 3730(1) 39(1)

C(4) 4247(1) 827(1) 3321(1) 45(1)

C(5) 4524(1) 1244(1) 2940(1) 45(1)

C(6) 5226(1) 1535(1) 2955(1) 34(1)

C(7) 5714(1) 1393(1) 3365(1) 32(1)

C(8) 6761(1) 730(1) 4782(1) 34(1)

C(9) 7345(1) 257(1) 4797(1) 42(1)

C(10) 7543(1) -58(1) 5237(1) 48(1)

C(11) 7167(1) 102(1) 5668(1) 51(1)

C(12) 6605(1) 589(1) 5659(1) 49(1)

C(13) 6401(1) 901(1) 5218(1) 41(1)

C(14) 5499(1) 2012(1) 2559(1) 36(1)

C(15) 5830(1) 1752(1) 2126(1) 41(1)

C(16) 5906(1) 1029(1) 2037(1) 54(1)

C(17) 6209(2) 795(2) 1607(1) 71(1)

C(18) 6460(2) 1263(2) 1242(1) 76(1)

C(19) 6419(1) 1945(2) 1315(1) 64(1)

C(20) 6110(1) 2221(1) 1759(1) 46(1)

C(21) 6079(1) 2929(1) 1848(1) 50(1)

C(22) 5747(1) 3199(1) 2269(1) 43(1)

C(23) 5692(1) 3928(1) 2357(1) 54(1)

C(24) 5352(1) 4180(1) 2764(1) 58(1)

C(25) 5038(1) 3728(1) 3111(1) 52(1)

C(26) 5073(1) 3032(1) 3047(1) 43(1)

C(27) 5437(1) 2737(1) 2628(1) 37(1)

C(28) 8388(1) 372(1) 3658(1) 37(1)

C(29) 8895(1) 625(1) 4030(1) 34(1)

C(30) 9560(1) 250(1) 4110(1) 43(1)

C(31) 10074(1) 440(1) 4455(1) 48(1)

C(32) 9940(1) 1035(1) 4735(1) 43(1)

C(33) 9300(1) 1423(1) 4678(1) 33(1)

C(34) 8742(1) 1224(1) 4322(1) 32(1)

C(35) 7372(1) 206(1) 3152(1) 37(1)

C(36) 7707(1) 68(1) 2703(1) 54(1)

C(37) 7351(1) -359(1) 2364(1) 62(1)

C(38) 6670(1) -647(1) 2469(1) 54(1)

C(39) 6333(1) -509(1) 2915(1) 48(1)

C(40) 6686(1) -85(1) 3254(1) 42(1)

C(41) 9158(1) 2065(1) 4975(1) 34(1)

C(42) 9317(1) 2716(1) 4767(1) 36(1)

C(43) 9685(1) 2792(1) 4302(1) 40(1)

C(44) 9773(1) 3423(1) 4087(1) 46(1)

C(45) 9507(1) 4022(1) 4326(1) 50(1)

C(46) 9187(1) 3984(1) 4778(1) 47(1)

C(47) 9078(1) 3333(1) 5018(1) 37(1)

C(48) 8738(1) 3278(1) 5476(1) 43(1)

C(49) 8620(1) 2643(1) 5705(1) 39(1)

C(50) 8292(1) 2583(1) 6183(1) 49(1)

C(51) 8155(1) 1964(1) 6391(1) 52(1)

C(52) 8333(1) 1351(1) 6129(1) 50(1)

C(53) 8653(1) 1378(1) 5677(1) 44(1)

C(54) 8823(1) 2021(1) 5444(1) 35(1)

C(55) 7453(2) 3042(1) 3906(1) 85(1)

C(56) 7533(2) 2904(1) 3381(1) 85(1)

C(57) 7120(2) 2611(2) 4700(1) 57(1)

C(58) 6156(2) 2745(2) 4112(1) 74(1)

C(59) 8644(1) 2184(2) 3300(1) 59(1)

C(60) 7628(2) 2053(2) 2755(1) 71(1)

________________________________________________________________________________

**Table 3. Selected bond lengths [Å] and angles [°] for 9 (CCDC 161495).**

_______________________________________________________________________________

Ni(1)-O(1) 1.9959(11)

Ni(1)-O(2) 1.9991(11)

Ni(1)-N(1) 2.1289(14)

Ni(1)-N(2) 2.1383(14)

Ni(1)-N(4) 2.2263(14)

Ni(1)-N(3) 2.2517(14)

O(1)-Ni(1)-O(2) 172.87(5)

O(1)-Ni(1)-N(1) 96.84(5)

O(2)-Ni(1)-N(1) 87.67(5)

O(1)-Ni(1)-N(2) 87.51(5)

O(2)-Ni(1)-N(2) 97.70(5)

N(1)-Ni(1)-N(2) 94.10(5)

O(1)-Ni(1)-N(4) 92.10(5)

O(2)-Ni(1)-N(4) 82.84(5)

N(1)-Ni(1)-N(4) 168.98(6)

N(2)-Ni(1)-N(4) 92.71(6)

O(1)-Ni(1)-N(3) 84.20(5)

O(2)-Ni(1)-N(3) 90.19(5)

N(1)-Ni(1)-N(3) 91.34(5)

N(2)-Ni(1)-N(3) 170.57(6)

N(4)-Ni(1)-N(3) 83.13(6)

_______________________________________________________________________________

**Table 4. Bond lengths [Å] and angles [°] for 9 (CCDC 161495).**

_______________________________________________________________________________

Ni(1)-O(1) 1.9959(11)

Ni(1)-O(2) 1.9991(11)

Ni(1)-N(1) 2.1289(14)

Ni(1)-N(2) 2.1383(14)

Ni(1)-N(4) 2.2263(14)

Ni(1)-N(3) 2.2517(14)

O(1)-C(34) 1.2913(18)

O(2)-C(7) 1.2839(18)

N(1)-C(1) 1.298(2)

N(1)-C(8) 1.435(2)

N(2)-C(28) 1.299(2)

N(2)-C(35) 1.437(2)

N(3)-C(58) 1.448(3)

N(3)-C(57) 1.466(3)

N(3)-C(55) 1.489(3)

N(4)-C(56) 1.456(3)

N(4)-C(59) 1.467(3)

N(4)-C(60) 1.474(3)

C(1)-C(2) 1.436(2)

C(1)-H(1) 0.978(13)

C(2)-C(3) 1.407(2)

C(2)-C(7) 1.423(2)

C(3)-C(4) 1.363(2)

C(3)-H(3) 0.981(13)

C(4)-C(5) 1.396(3)

C(4)-H(4) 0.939(15)

C(5)-C(6) 1.371(2)

C(5)-H(5) 0.916(14)

C(6)-C(7) 1.433(2)

C(6)-C(14) 1.493(2)

C(8)-C(13) 1.379(2)

C(8)-C(9) 1.384(2)

C(9)-C(10) 1.382(2)

C(9)-H(9) 0.955(14)

C(10)-C(11) 1.378(3)

C(10)-H(10) 0.948(15)

C(11)-C(12) 1.372(3)

C(11)-H(11) 0.953(16)

C(12)-C(13) 1.384(3)

C(12)-H(12) 0.933(15)

C(13)-H(13) 0.921(14)

C(14)-C(15) 1.403(2)

C(14)-C(27) 1.415(2)

C(15)-C(16) 1.422(3)

C(15)-C(20) 1.431(2)

C(16)-C(17) 1.357(3)

C(16)-H(16) 0.942(16)

C(17)-C(18) 1.409(3)

C(17)-H(17) 0.961(18)

C(18)-C(19) 1.332(3)

C(18)-H(18) 0.924(19)

C(19)-C(20) 1.424(3)

C(19)-H(19) 0.937(17)

C(20)-C(21) 1.388(3)

C(21)-C(22) 1.384(3)

C(21)-H(21) 0.933(15)

C(22)-C(23) 1.428(3)

C(22)-C(27) 1.429(2)

C(23)-C(24) 1.346(3)

C(23)-H(23) 0.901(16)

C(24)-C(25) 1.398(3)

C(24)-H(24) 0.946(17)

C(25)-C(26) 1.354(3)

C(25)-H(25) 0.946(15)

C(26)-C(27) 1.422(2)

C(26)-H(26) 0.934(14)

C(28)-C(29) 1.436(2)

C(28)-H(28) 0.962(14)

C(29)-C(30) 1.404(2)

C(29)-C(34) 1.425(2)

C(30)-C(31) 1.357(2)

C(30)-H(30) 0.929(15)

C(31)-C(32) 1.394(2)

C(31)-H(31) 0.945(15)

C(32)-C(33) 1.372(2)

C(32)-H(32) 0.929(15)

C(33)-C(34) 1.434(2)

C(33)-C(41) 1.497(2)

C(35)-C(40) 1.373(2)

C(35)-C(36) 1.377(2)

C(36)-C(37) 1.385(3)

C(36)-H(36) 0.937(16)

C(37)-C(38) 1.364(3)

C(37)-H(37) 0.985(18)

C(38)-C(39) 1.373(3)

C(38)-H(38) 0.915(17)

C(39)-C(40) 1.380(2)

C(39)-H(39) 0.948(16)

C(40)-H(40) 0.930(14)

C(41)-C(54) 1.403(2)

C(41)-C(42) 1.405(2)

C(42)-C(43) 1.424(2)

C(42)-C(47) 1.434(2)

C(43)-C(44) 1.358(2)

C(43)-H(43) 0.931(13)

C(44)-C(45) 1.405(3)

C(44)-H(44) 1.003(15)

C(45)-C(46) 1.348(3)

C(45)-H(45) 0.908(15)

C(46)-C(47) 1.426(2)

C(46)-H(46) 0.946(15)

C(47)-C(48) 1.383(2)

C(48)-C(49) 1.388(2)

C(48)-H(48) 0.927(15)

C(49)-C(50) 1.423(2)

C(49)-C(54) 1.436(2)

C(50)-C(51) 1.342(3)

C(50)-H(50) 0.925(15)

C(51)-C(52) 1.415(3)

C(51)-H(51) 0.958(15)

C(52)-C(53) 1.346(3)

C(52)-H(52) 0.923(16)

C(53)-C(54) 1.425(2)

C(53)-H(53) 0.958(14)

C(55)-C(56) 1.451(4)

C(55)-H(55A) 1.066(18)

C(55)-H(55B) 1.03(3)

C(56)-H(56A) 0.969(19)

C(56)-H(56B) 1.14(3)

C(57)-H(57A) 0.92(2)

C(57)-H(57B) 0.98(2)

C(57)-H(57C) 0.990(18)

C(58)-H(58A) 0.981(18)

C(58)-H(58B) 0.980(17)

C(58)-H(58C) 0.98(2)

C(59)-H(59A) 0.968(17)

C(59)-H(59B) 0.96(2)

C(59)-H(59C) 0.946(18)

C(60)-H(60A) 0.95(2)

C(60)-H(60B) 0.97(3)

C(60)-H(60C) 0.997(17)

O(1)-Ni(1)-O(2) 172.87(5)

O(1)-Ni(1)-N(1) 96.84(5)

O(2)-Ni(1)-N(1) 87.67(5)

O(1)-Ni(1)-N(2) 87.51(5)

O(2)-Ni(1)-N(2) 97.70(5)

N(1)-Ni(1)-N(2) 94.10(5)

O(1)-Ni(1)-N(4) 92.10(5)

O(2)-Ni(1)-N(4) 82.84(5)

N(1)-Ni(1)-N(4) 168.98(6)

N(2)-Ni(1)-N(4) 92.71(6)

O(1)-Ni(1)-N(3) 84.20(5)

O(2)-Ni(1)-N(3) 90.19(5)

N(1)-Ni(1)-N(3) 91.34(5)

N(2)-Ni(1)-N(3) 170.57(6)

N(4)-Ni(1)-N(3) 83.13(6)

C(34)-O(1)-Ni(1) 133.18(11)

C(7)-O(2)-Ni(1) 133.09(11)

C(1)-N(1)-C(8) 113.69(15)

C(1)-N(1)-Ni(1) 123.72(12)

C(8)-N(1)-Ni(1) 122.59(11)

C(28)-N(2)-C(35) 113.57(15)

C(28)-N(2)-Ni(1) 123.64(12)

C(35)-N(2)-Ni(1) 122.79(11)

C(58)-N(3)-C(57) 107.7(2)

C(58)-N(3)-C(55) 112.4(2)

C(57)-N(3)-C(55) 107.1(2)

C(58)-N(3)-Ni(1) 114.07(14)

C(57)-N(3)-Ni(1) 114.20(13)

C(55)-N(3)-Ni(1) 101.08(13)

C(56)-N(4)-C(59) 112.2(2)

C(56)-N(4)-C(60) 107.6(2)

C(59)-N(4)-C(60) 105.9(2)

C(56)-N(4)-Ni(1) 103.85(14)

C(59)-N(4)-Ni(1) 113.22(13)

C(60)-N(4)-Ni(1) 114.06(14)

N(1)-C(1)-C(2) 128.74(17)

N(1)-C(1)-H(1) 117.4(8)

C(2)-C(1)-H(1) 113.8(8)

C(3)-C(2)-C(7) 119.75(16)

C(3)-C(2)-C(1) 117.16(16)

C(7)-C(2)-C(1) 123.06(16)

C(4)-C(3)-C(2) 121.78(19)

C(4)-C(3)-H(3) 120.4(8)

C(2)-C(3)-H(3) 117.8(8)

C(3)-C(4)-C(5) 118.57(19)

C(3)-C(4)-H(4) 120.8(10)

C(5)-C(4)-H(4) 120.6(10)

C(6)-C(5)-C(4) 122.35(19)

C(6)-C(5)-H(5) 117.6(10)

C(4)-C(5)-H(5) 120.0(10)

C(5)-C(6)-C(7) 119.86(17)

C(5)-C(6)-C(14) 121.74(16)

C(7)-C(6)-C(14) 118.38(15)

O(2)-C(7)-C(2) 123.38(15)

O(2)-C(7)-C(6) 119.31(16)

C(2)-C(7)-C(6) 117.30(16)

C(13)-C(8)-C(9) 118.76(18)

C(13)-C(8)-N(1) 122.36(17)

C(9)-C(8)-N(1) 118.77(16)

C(10)-C(9)-C(8) 120.4(2)

C(10)-C(9)-H(9) 119.3(9)

C(8)-C(9)-H(9) 120.2(9)

C(11)-C(10)-C(9) 120.3(2)

C(11)-C(10)-H(10) 121.6(10)

C(9)-C(10)-H(10) 118.1(10)

C(12)-C(11)-C(10) 119.6(2)

C(12)-C(11)-H(11) 120.1(10)

C(10)-C(11)-H(11) 120.3(10)

C(11)-C(12)-C(13) 120.2(2)

C(11)-C(12)-H(12) 121.1(10)

C(13)-C(12)-H(12) 118.7(10)

C(8)-C(13)-C(12) 120.7(2)

C(8)-C(13)-H(13) 119.1(10)

C(12)-C(13)-H(13) 120.2(10)

C(15)-C(14)-C(27) 119.79(17)

C(15)-C(14)-C(6) 120.95(16)

C(27)-C(14)-C(6) 119.24(16)

C(14)-C(15)-C(16) 122.19(19)

C(14)-C(15)-C(20) 119.87(18)

C(16)-C(15)-C(20) 117.94(19)

C(17)-C(16)-C(15) 120.6(2)

C(17)-C(16)-H(16) 120.6(11)

C(15)-C(16)-H(16) 118.9(11)

C(16)-C(17)-C(18) 120.9(3)

C(16)-C(17)-H(17) 118.7(12)

C(18)-C(17)-H(17) 120.4(12)

C(19)-C(18)-C(17) 120.7(3)

C(19)-C(18)-H(18) 118.1(13)

C(17)-C(18)-H(18) 121.1(13)

C(18)-C(19)-C(20) 120.9(3)

C(18)-C(19)-H(19) 123.8(12)

C(20)-C(19)-H(19) 115.1(12)

C(21)-C(20)-C(19) 121.9(2)

C(21)-C(20)-C(15) 119.20(19)

C(19)-C(20)-C(15) 118.9(2)

C(22)-C(21)-C(20) 122.0(2)

C(22)-C(21)-H(21) 118.1(10)

C(20)-C(21)-H(21) 120.0(10)

C(21)-C(22)-C(23) 122.5(2)

C(21)-C(22)-C(27) 119.28(19)

C(23)-C(22)-C(27) 118.3(2)

C(24)-C(23)-C(22) 121.5(2)

C(24)-C(23)-H(23) 121.1(11)

C(22)-C(23)-H(23) 117.4(11)

C(23)-C(24)-C(25) 120.1(2)

C(23)-C(24)-H(24) 119.6(11)

C(25)-C(24)-H(24) 120.3(11)

C(26)-C(25)-C(24) 121.0(2)

C(26)-C(25)-H(25) 115.7(10)

C(24)-C(25)-H(25) 123.3(10)

C(25)-C(26)-C(27) 121.2(2)

C(25)-C(26)-H(26) 120.3(10)

C(27)-C(26)-H(26) 118.5(10)

C(14)-C(27)-C(26) 122.37(18)

C(14)-C(27)-C(22) 119.73(18)

C(26)-C(27)-C(22) 117.89(18)

N(2)-C(28)-C(29) 129.08(18)

N(2)-C(28)-H(28) 116.8(9)

C(29)-C(28)-H(28) 114.1(9)

C(30)-C(29)-C(34) 119.59(17)

C(30)-C(29)-C(28) 117.49(17)

C(34)-C(29)-C(28) 122.91(17)

C(31)-C(30)-C(29) 122.33(19)

C(31)-C(30)-H(30) 121.0(10)

C(29)-C(30)-H(30) 116.6(10)

C(30)-C(31)-C(32) 118.7(2)

C(30)-C(31)-H(31) 121.4(9)

C(32)-C(31)-H(31) 119.9(9)

C(33)-C(32)-C(31) 121.97(19)

C(33)-C(32)-H(32) 117.7(10)

C(31)-C(32)-H(32) 120.3(10)

C(32)-C(33)-C(34) 120.36(17)

C(32)-C(33)-C(41) 122.02(16)

C(34)-C(33)-C(41) 117.62(15)

O(1)-C(34)-C(29) 123.43(16)

O(1)-C(34)-C(33) 119.50(15)

C(29)-C(34)-C(33) 117.07(16)

C(40)-C(35)-C(36) 118.97(19)

C(40)-C(35)-N(2) 119.20(17)

C(36)-C(35)-N(2) 121.75(18)

C(35)-C(36)-C(37) 120.0(2)

C(35)-C(36)-H(36) 118.7(10)

C(37)-C(36)-H(36) 121.3(11)

C(38)-C(37)-C(36) 120.7(2)

C(38)-C(37)-H(37) 121.0(11)

C(36)-C(37)-H(37) 118.3(11)

C(37)-C(38)-C(39) 119.5(2)

C(37)-C(38)-H(38) 119.7(11)

C(39)-C(38)-H(38) 120.8(11)

C(38)-C(39)-C(40) 120.0(2)

C(38)-C(39)-H(39) 121.4(10)

C(40)-C(39)-H(39) 118.6(10)

C(35)-C(40)-C(39) 120.8(2)

C(35)-C(40)-H(40) 121.7(9)

C(39)-C(40)-H(40) 117.5(9)

C(54)-C(41)-C(42) 120.03(16)

C(54)-C(41)-C(33) 120.49(16)

C(42)-C(41)-C(33) 119.34(16)

C(41)-C(42)-C(43) 122.52(17)

C(41)-C(42)-C(47) 119.48(17)

C(43)-C(42)-C(47) 117.95(17)

C(44)-C(43)-C(42) 121.47(19)

C(44)-C(43)-H(43) 118.6(9)

C(42)-C(43)-H(43) 119.9(9)

C(43)-C(44)-C(45) 120.1(2)

C(43)-C(44)-H(44) 119.6(10)

C(45)-C(44)-H(44) 120.3(10)

C(46)-C(45)-C(44) 120.9(2)

C(46)-C(45)-H(45) 121.1(10)

C(44)-C(45)-H(45) 118.0(10)

C(45)-C(46)-C(47) 121.1(2)

C(45)-C(46)-H(46) 122.1(9)

C(47)-C(46)-H(46) 116.7(9)

C(48)-C(47)-C(46) 122.31(18)

C(48)-C(47)-C(42) 119.35(18)

C(46)-C(47)-C(42) 118.32(18)

C(47)-C(48)-C(49) 122.18(18)

C(47)-C(48)-H(48) 119.4(10)

C(49)-C(48)-H(48) 118.4(10)

C(48)-C(49)-C(50) 122.56(18)

C(48)-C(49)-C(54) 118.67(17)

C(50)-C(49)-C(54) 118.76(18)

C(51)-C(50)-C(49) 121.9(2)

C(51)-C(50)-H(50) 120.5(10)

C(49)-C(50)-H(50) 117.7(10)

C(50)-C(51)-C(52) 119.5(2)

C(50)-C(51)-H(51) 121.3(10)

C(52)-C(51)-H(51) 119.2(10)

C(53)-C(52)-C(51) 121.1(2)

C(53)-C(52)-H(52) 120.6(11)

C(51)-C(52)-H(52) 118.2(11)

C(52)-C(53)-C(54) 121.6(2)

C(52)-C(53)-H(53) 120.7(9)

C(54)-C(53)-H(53) 117.7(9)

C(41)-C(54)-C(53) 122.82(17)

C(41)-C(54)-C(49) 120.05(17)

C(53)-C(54)-C(49) 117.11(17)

C(56)-C(55)-N(3) 114.8(2)

C(56)-C(55)-H(55A) 111.0(10)

N(3)-C(55)-H(55A) 104.2(10)

C(56)-C(55)-H(55B) 104.8(19)

N(3)-C(55)-H(55B) 108.4(18)

H(55A)-C(55)-H(55B) 114(2)

C(55)-C(56)-N(4) 113.5(2)

C(55)-C(56)-H(56A) 110.0(11)

N(4)-C(56)-H(56A) 112.4(11)

C(55)-C(56)-H(56B) 80.1(15)

N(4)-C(56)-H(56B) 119.5(14)

H(56A)-C(56)-H(56B) 116.9(18)

N(3)-C(57)-H(57A) 110.7(12)

N(3)-C(57)-H(57B) 109.0(14)

H(57A)-C(57)-H(57B) 113.2(19)

N(3)-C(57)-H(57C) 111.2(10)

H(57A)-C(57)-H(57C) 107.1(16)

H(57B)-C(57)-H(57C) 105.6(17)

N(3)-C(58)-H(58A) 110.5(11)

N(3)-C(58)-H(58B) 109.6(12)

H(58A)-C(58)-H(58B) 110.3(16)

N(3)-C(58)-H(58C) 109.8(13)

H(58A)-C(58)-H(58C) 109.1(17)

H(58B)-C(58)-H(58C) 107.4(18)

N(4)-C(59)-H(59A) 109.9(11)

N(4)-C(59)-H(59B) 112.6(14)

H(59A)-C(59)-H(59B) 110.4(17)

N(4)-C(59)-H(59C) 106.3(12)

H(59A)-C(59)-H(59C) 109.4(15)

H(59B)-C(59)-H(59C) 108.3(18)

N(4)-C(60)-H(60A) 106.7(14)

N(4)-C(60)-H(60B) 107.5(18)

H(60A)-C(60)-H(60B) 114(2)

N(4)-C(60)-H(60C) 109.8(10)

H(60A)-C(60)-H(60C) 108.5(17)

H(60B)-C(60)-H(60C) 110(2)

**Table 5. Anisotropic displacement parameters (Å2x 104** **) for 9 (CCDC 161495). The anisotropic displacement factor exponent takes the form: -2p2** **[ h2** **a*2U 11 + ... + 2 h k a* b* U12 ]**

______________________________________________________________________________

U11 U22 U33 U23 U13 U12

______________________________________________________________________________

Ni(1) 327(1) 347(1) 319(1) -2(1) -16(1) -4(1)

O(1) 336(7) 331(7) 361(7) -60(6) -45(5) 42(6)

O(2) 308(7) 431(8) 343(7) 52(6) -35(6) -40(6)

N(1) 370(9) 313(9) 309(9) 4(7) -8(7) 22(7)

N(2) 367(9) 412(9) 300(8) -46(7) -7(8) -15(8)

N(3) 420(10) 357(9) 454(10) -12(8) -45(8) 47(8)

N(4) 387(10) 513(11) 425(10) 43(8) -4(8) -70(8)

C(1) 379(12) 274(11) 368(12) 9(9) 77(10) 0(9)

C(2) 322(10) 300(10) 338(11) -3(9) -11(9) 15(8)

C(3) 377(12) 353(11) 429(13) 24(10) 33(10) 3(9)

C(4) 347(13) 445(13) 567(14) 24(11) -69(11) -96(10)

C(5) 419(13) 467(13) 456(14) 36(11) -122(11) 0(10)

C(6) 364(11) 318(10) 349(11) -7(9) -52(8) 15(10)

C(7) 340(11) 275(11) 355(11) -57(8) -11(9) 21(8)

C(8) 359(11) 340(11) 320(11) 40(9) -22(9) -70(9)

C(9) 421(13) 464(13) 374(12) 46(10) 27(11) -13(10)

C(10) 447(14) 487(14) 511(14) 142(12) -81(11) 4(11)

C(11) 585(15) 551(15) 386(13) 114(12) -132(12) -154(13)

C(12) 613(16) 540(14) 310(13) -24(11) 24(12) -124(12)

C(13) 444(13) 393(13) 386(12) -9(10) 4(11) -14(10)

C(14) 331(11) 393(12) 357(11) 24(9) -110(9) 11(9)

C(15) 396(12) 467(13) 366(12) -3(10) -93(9) 43(10)

C(16) 628(16) 515(16) 463(15) -44(13) -51(12) 43(12)

C(17) 850(20) 627(19) 646(18) -176(16) -35(15) 164(16)

C(18) 766(19) 1010(20) 493(18) -168(18) 48(15) 181(17)

C(19) 625(17) 850(20) 450(16) 52(16) 32(12) 70(16)

C(20) 397(12) 624(15) 361(13) 13(11) -52(10) 50(11)

C(21) 442(14) 586(16) 479(14) 207(13) -34(11) -30(12)

C(22) 374(12) 445(13) 475(13) 83(11) -87(10) -1(10)

C(23) 481(15) 463(16) 687(18) 191(14) -95(13) -46(12)

C(24) 519(15) 375(15) 850(20) -24(15) -157(14) 29(12)

C(25) 451(14) 490(15) 613(16) -96(13) -77(12) 64(11)

C(26) 363(13) 443(14) 488(14) 21(12) -64(10) -12(11)

C(27) 323(11) 401(12) 395(12) 44(10) -92(9) 17(9)

C(28) 401(12) 357(12) 356(12) -77(9) 55(9) 8(10)

C(29) 354(11) 349(11) 304(10) -56(9) -7(8) 12(9)

C(30) 472(13) 351(12) 458(13) -128(10) -3(10) 73(10)

C(31) 435(13) 416(13) 585(15) -73(11) -108(11) 165(11)

C(32) 434(13) 410(13) 444(13) -74(10) -127(11) 42(10)

C(33) 366(11) 305(11) 315(10) 2(9) -29(9) 27(9)

C(34) 345(11) 303(10) 316(11) 10(9) 14(9) -3(9)

C(35) 385(12) 384(11) 354(11) -60(9) -45(9) 43(9)

C(36) 431(14) 748(16) 426(13) -168(11) 0(12) -83(13)

C(37) 558(16) 869(18) 421(14) -254(13) -30(13) 13(14)

C(38) 530(15) 561(15) 521(15) -230(12) -170(12) 30(12)

C(39) 415(14) 433(13) 591(15) -81(11) -58(12) -27(11)

C(40) 430(13) 416(12) 420(13) -92(10) 10(11) 30(10)

C(41) 335(11) 309(11) 362(11) -52(9) -100(9) 33(9)

C(42) 344(11) 341(11) 379(11) -19(9) -95(9) -3(9)

C(43) 406(12) 336(13) 460(13) -66(11) -22(10) 8(10)

C(44) 434(13) 477(14) 481(14) -5(12) 25(10) -61(11)

C(45) 521(14) 352(14) 618(16) 87(13) -40(12) -35(11)

C(46) 481(14) 338(13) 576(15) -74(12) -30(12) 35(10)

C(47) 367(11) 311(12) 437(12) -46(9) -83(9) -2(9)

C(48) 461(13) 357(13) 472(14) -135(11) -60(10) 49(10)

C(49) 401(12) 404(12) 379(12) -69(10) -72(9) 13(10)

C(50) 545(14) 472(14) 455(14) -130(13) 0(11) 24(11)

C(51) 593(15) 596(16) 364(13) -39(12) 15(11) -48(12)

C(52) 630(15) 483(15) 401(13) 51(12) -49(12) -85(11)

C(53) 560(14) 371(13) 387(12) -54(10) -64(11) 25(10)

C(54) 368(11) 348(11) 342(11) -36(9) -86(9) 0(9)

C(55) 1410(30) 331(15) 800(20) 20(14) 180(20) -116(17)

C(56) 1140(30) 415(16) 990(20) 201(15) 449(19) 1(16)

C(57) 594(19) 571(17) 541(16) -220(13) -109(14) 180(15)

C(58) 650(20) 640(20) 940(20) -327(19) -306(18) 259(16)

C(59) 447(15) 850(20) 472(16) 159(16) -21(12) -188(15)

C(60) 551(18) 1190(30) 391(15) 289(16) -50(13) -293(19)

______________________________________________________________________________

**Table 6. Hydrogen coordinates ( x 104) and isotropic displacement parameters (Å2x 10** **3) for 9 (CCDC 161495).**

________________________________________________________________________________

x y z U**iso**

________________________________________________________________________________

H(1) 5523(8) 637(7) 4469(5) 26(4)

H(3) 4493(8) 456(7) 4010(5) 24(4)

H(4) 3762(9) 637(8) 3302(6) 43(5)

H(5) 4226(8) 1347(7) 2673(5) 34(5)

H(9) 7604(8) 133(7) 4500(5) 25(4)

H(10) 7927(9) -398(8) 5230(6) 39(5)

H(11) 7309(9) -109(8) 5973(6) 49(5)

H(12) 6343(9) 707(8) 5946(6) 37(5)

H(13) 6025(8) 1229(7) 5212(5) 29(5)

H(16) 5746(9) 714(9) 2281(6) 48(6)

H(17) 6262(10) 304(10) 1560(7) 67(7)

H(18) 6659(11) 1106(10) 947(7) 78(8)

H(19) 6550(11) 2276(9) 1075(7) 62(7)

H(21) 6281(9) 3239(8) 1619(6) 41(5)

H(23) 5890(9) 4214(8) 2128(6) 45(6)

H(24) 5325(10) 4666(9) 2813(6) 60(6)

H(25) 4783(9) 3880(8) 3398(6) 41(6)

H(26) 4861(8) 2733(8) 3281(5) 33(5)

H(28) 8552(8) -49(8) 3500(5) 36(5)

H(30) 9627(8) -147(8) 3920(6) 38(5)

H(31) 10507(9) 170(8) 4516(5) 35(5)

H(32) 10286(9) 1179(8) 4970(6) 38(5)

H(36) 8175(10) 268(8) 2633(6) 52(6)

H(37) 7600(10) -443(9) 2044(7) 67(6)

H(38) 6445(10) -932(9) 2242(6) 57(6)

H(39) 5858(9) -699(8) 2997(6) 48(6)

H(40) 6449(8) -20(7) 3558(5) 30(5)

H(43) 9859(8) 2401(7) 4135(5) 24(4)

H(44) 10003(9) 3456(8) 3749(6) 45(5)

H(45) 9560(9) 4435(8) 4168(6) 38(5)

H(46) 9004(8) 4382(8) 4944(5) 38(5)

H(48) 8575(9) 3676(8) 5636(5) 37(5)

H(50) 8172(9) 2988(8) 6348(6) 42(5)

H(51) 7922(9) 1928(8) 6710(6) 45(5)

H(52) 8219(9) 930(9) 6273(6) 51(6)

H(53) 8771(8) 960(8) 5501(5) 30(5)

H(55A) 7216(10) 3542(10) 3969(6) 65(6)

H(55B) 7985(18) 2984(17) 4049(12) 187(18)

H(56A) 7829(10) 3267(10) 3227(6) 63(6)

H(56B) 6900(17) 2991(14) 3401(11) 158(12)

H(57A) 7615(12) 2498(10) 4756(7) 76(8)

H(57B) 6767(13) 2323(12) 4888(8) 110(11)

H(57C) 7045(9) 3090(10) 4824(6) 54(6)

H(58A) 6063(10) 3215(10) 4236(6) 61(6)

H(58B) 5840(10) 2409(9) 4287(7) 55(8)

H(58C) 6020(12) 2725(11) 3762(8) 90(9)

H(59A) 8862(10) 2505(9) 3065(6) 58(6)

H(59B) 8836(12) 1724(11) 3246(8) 91(10)

H(59C) 8774(10) 2322(9) 3625(7) 64(7)

H(60A) 7102(13) 2109(11) 2725(8) 92(9)

H(60B) 7807(17) 1586(15) 2686(11) 164(16)

H(60C) 7879(9) 2389(9) 2529(6) 55(6)

________________________________________________________________________________

X-Ray Diffraction Analysis of

**(Anthr,HSal)Ni(NCMe)Me 7 (CCDC No. 139263).**

**Table 1. Crystal data and structure refinement for 7 (CCDC No. 139263).**

Empirical formula C36H36N2NiO

Formula weight 571.38

Crystallization Solvent Acetonitrile

Crystal Habit Blade

Crystal size 0.36 x 0.22 x 0.06 mm3

Crystal color Dichroic yellow/brown

# Data Collection

Type of diffractometer CCD area detector

Wavelength 0.71073 Å MoKa

Data Collection Temperature 98(2) K

 range for 5843 reflections used

in lattice determination 2.66 to 23.30°

Unit cell dimensions a = 18.0982(13) Å a= 90°

b = 14.4000(10) Å b= 90°

c = 22.3830(16) Å g = 90°

Volume 5833.3(7) Å3

Z 8

Crystal system Orthorhombic

Space group Pbca

Density (calculated) 1.301 Mg/m3

F(000) 2416

Data collection program Bruker SMART

 range for data collection 1.82 to 23.32°

Completeness to  = 23.32° 99.9 %

Index ranges -20  h  20, -16  k  16, -24  l  24

Data collection scan type  scans at 4  settings

Data reduction program Bruker SAINT v 6.01

Reflections collected 47311

Independent reflections 4213 [Rint= 0.0614]

Absorption coefficient 0.696 mm-1

Absorption correction None

**Table 1 (cont.)**

# Structure Solution and Refinement

Structure solution program SHELXS-97 (Sheldrick, 1990)

Primary solution method Direct methods

Secondary solution method Direct methods

Hydrogen placement Difference Fourier map

Structure refinement program SHELXL-97 (Sheldrick, 1997)

Refinement method Full-matrix least-squares on F2

Data / restraints / parameters 4213 / 0 / 505

Treatment of hydrogen atoms Unrestrained

Goodness-of-fit on F2 1.913

Final R indices [I>2s(I)] R1 = 0.0287, *w*R2 = 0.0518

R indices (all data) R1 = 0.0387, *w*R2 = 0.0527

Type of weighting scheme used Sigma

Weighting scheme used *w*=1/2(Fo2)

Max shift/error 0.001

Average shift/error 0.000

Largest diff. peak and hole 0.274 and -0.309 e.Å-3

# Special Refinement Details

Refinement of F2 against ALL reflections. The weighted R-factor (*w*R) and goodness of fit (S) are based on F2, conventional R-factors (R) are based on F, with F set to zero for negative F2. The threshold expression of F2 > 2( F2) is used only for calculating R-factors(gt) etc. and is not relevant to the choice of reflections for refinement. R-factors based on F2 are statistically about twice as large as those based on F, and R-factors based on ALL data will be even larger.

All esds (except the esd in the dihedral angle between two l.s. planes) are estimated using the full covariance matrix. The cell esds are taken into account individually in the estimation of esds in distances, angles and torsion angles; correlations between esds in cell parameters are only used when they are defined by crystal symmetry. An approximate (isotropic) treatment of cell esds is used for estimating esds involving l.s. planes.

**Table 2. Atomic coordinates ( x 104) and equivalent isotropic displacement parameters (Å2x 103) for 7 (CCDC No. 139263). U(eq) is defined as the trace of the orthogonalized Uij tensor.**

________________________________________________________________________________

x y z U**eq**

________________________________________________________________________________

Ni 1842(1) 542(1) 4277(1) 22(1)

N(1) 2579(1) 280(1) 3705(1) 20(1)

N(2) 1088(1) 822(1) 4812(1) 26(1)

O 1048(1) 168(1) 3768(1) 22(1)

C(1) 2550(1) 997(2) 4852(1) 27(1)

C(2) 583(1) 1031(2) 5082(1) 26(1)

C(3) -59(2) 1325(2) 5420(1) 34(1)

C(4) 3364(1) 351(1) 3841(1) 21(1)

C(5) 3738(1) 1157(1) 3671(1) 22(1)

C(6) 4484(1) 1227(2) 3831(1) 26(1)

C(7) 4827(1) 537(2) 4151(1) 28(1)

C(8) 4445(1) -251(2) 4312(1) 26(1)

C(9) 3704(1) -364(1) 4162(1) 23(1)

C(10) 3365(1) 1951(2) 3346(1) 27(1)

C(11) 3588(2) 1992(2) 2695(1) 36(1)

C(12) 3516(2) 2879(2) 3652(1) 31(1)

C(13) 3291(1) -1244(1) 4325(1) 29(1)

C(14) 3402(2) -1972(2) 3839(2) 41(1)

C(15) 3498(2) -1624(2) 4937(1) 41(1)

C(16) 2433(1) 98(1) 3150(1) 22(1)

C(17) 1730(1) 34(1) 2863(1) 19(1)

C(18) 1711(1) -104(1) 2244(1) 24(1)

C(19) 1061(1) -189(2) 1942(1) 26(1)

C(20) 398(1) -158(1) 2264(1) 25(1)

C(21) 378(1) -39(1) 2873(1) 20(1)

C(22) 1058(1) 65(1) 3194(1) 20(1)

C(23) -344(1) -53(1) 3198(1) 21(1)

C(24) -599(1) 742(1) 3505(1) 21(1)

C(25) -201(1) 1599(2) 3522(1) 26(1)

C(26) -473(1) 2359(2) 3798(1) 31(1)

C(27) -1162(1) 2326(2) 4101(1) 33(1)

C(28) -1556(1) 1532(2) 4105(1) 30(1)

C(29) -1301(1) 717(1) 3806(1) 24(1)

C(30) -1717(1) -89(2) 3788(1) 25(1)

C(31) -1479(1) -881(1) 3492(1) 23(1)

C(32) -1910(1) -1712(2) 3477(1) 29(1)

C(33) -1671(1) -2488(2) 3203(1) 32(1)

C(34) -975(1) -2485(2) 2917(1) 29(1)

C(35) -547(1) -1712(2) 2907(1) 26(1)

C(36) -778(1) -867(1) 3191(1) 21(1)

________________________________________________________________________________

**Table 3. Selected bond lengths [Å] and angles [°] for 7 (CCDC No. 139263).**

Ni-N(2) 1.8588(19)

Ni-N(1) 1.8872(16)

Ni-O 1.9107(13)

Ni-C(1) 1.931(2)

N(2)-Ni-N(1) 177.34(7)

N(2)-Ni-O 83.87(6)

N(1)-Ni-O 94.12(6)

N(2)-Ni-C(1) 89.07(9)

N(1)-Ni-C(1) 92.88(9)

O-Ni-C(1) 172.72(9)

**Table 4. Bond lengths [Å] and angles [°] for 7 (CCDC No. 139263).**

Ni-N(2) 1.8588(19)

Ni-N(1) 1.8872(16)

Ni-O 1.9107(13)

Ni-C(1) 1.931(2)

N(1)-C(16) 1.299(3)

N(1)-C(4) 1.455(2)

N(2)-C(2) 1.136(3)

O-C(22) 1.294(2)

C(1)-H(1A) 0.96(2)

C(1)-H(1B) 1.01(2)

C(1)-H(1C) 0.98(2)

C(2)-C(3) 1.451(3)

C(3)-H(3A) 0.96(2)

C(3)-H(3B) 0.96(2)

C(3)-H(3C) 1.00(2)

C(4)-C(9) 1.398(3)

C(4)-C(5) 1.397(3)

C(5)-C(6) 1.399(3)

C(5)-C(10) 1.514(3)

C(6)-C(7) 1.373(3)

C(6)-H(6) 0.958(18)

C(7)-C(8) 1.376(3)

C(7)-H(7) 0.976(18)

C(8)-C(9) 1.392(3)

C(8)-H(8) 0.953(18)

C(9)-C(13) 1.516(3)

C(10)-C(12) 1.526(3)

C(10)-C(11) 1.514(3)

C(10)-H(10) 0.902(17)

C(11)-H(11A) 1.01(2)

C(11)-H(11B) 0.92(2)

C(11)-H(11C) 0.96(2)

C(12)-H(12A) 0.98(2)

C(12)-H(12B) 0.981(19)

C(12)-H(12C) 0.99(2)

C(13)-C(15) 1.522(3)

C(13)-C(14) 1.524(3)

C(13)-H(13) 0.950(18)

C(14)-H(14A) 0.96(3)

C(14)-H(14B) 0.95(2)

C(14)-H(14C) 1.01(2)

C(15)-H(15A) 0.97(2)

C(15)-H(15B) 1.03(2)

C(15)-H(15C) 0.96(2)

C(16)-C(17) 1.427(3)

C(16)-H(16) 0.928(18)

C(17)-C(18) 1.401(3)

C(17)-C(22) 1.426(3)

C(18)-C(19) 1.362(3)

C(18)-H(18) 0.934(18)

C(19)-C(20) 1.400(3)

C(19)-H(19) 0.916(19)

C(20)-C(21) 1.375(3)

C(20)-H(20) 0.928(18)

C(21)-C(22) 1.432(3)

C(21)-C(23) 1.495(3)

C(23)-C(24) 1.414(3)

C(23)-C(36) 1.411(3)

C(24)-C(29) 1.439(3)

C(24)-C(25) 1.429(3)

C(25)-C(26) 1.351(3)

C(25)-H(25) 0.919(18)

C(26)-C(27) 1.419(3)

C(26)-H(26) 0.935(19)

C(27)-C(28) 1.348(3)

C(27)-H(27) 0.97(2)

C(28)-C(29) 1.426(3)

C(28)-H(28) 0.940(19)

C(29)-C(30) 1.385(3)

C(30)-C(31) 1.387(3)

C(30)-H(30) 0.920(18)

C(31)-C(36) 1.437(3)

C(31)-C(32) 1.428(3)

C(32)-C(33) 1.346(3)

C(32)-H(32) 0.87(2)

C(33)-C(34) 1.414(3)

C(33)-H(33) 0.978(19)

C(34)-C(35) 1.357(3)

C(34)-H(34) 0.898(18)

C(35)-C(36) 1.435(3)

C(35)-H(35) 0.926(17)

N(2)-Ni-N(1) 177.34(7)

N(2)-Ni-O 83.87(6)

N(1)-Ni-O 94.12(6)

N(2)-Ni-C(1) 89.07(9)

N(1)-Ni-C(1) 92.88(9)

O-Ni-C(1) 172.72(9)

C(16)-N(1)-C(4) 114.45(17)

C(16)-N(1)-Ni 123.03(15)

C(4)-N(1)-Ni 122.29(13)

C(2)-N(2)-Ni 171.95(18)

C(22)-O-Ni 127.87(13)

Ni-C(1)-H(1A) 109.3(11)

Ni-C(1)-H(1B) 112.2(12)

H(1A)-C(1)-H(1B) 106.3(16)

Ni-C(1)-H(1C) 109.5(11)

H(1A)-C(1)-H(1C) 111.5(16)

H(1B)-C(1)-H(1C) 108.0(16)

N(2)-C(2)-C(3) 178.3(3)

C(2)-C(3)-H(3A) 113.4(13)

C(2)-C(3)-H(3B) 103.1(14)

H(3A)-C(3)-H(3B) 113(2)

C(2)-C(3)-H(3C) 107.5(14)

H(3A)-C(3)-H(3C) 107.8(19)

H(3B)-C(3)-H(3C) 112.4(19)

C(9)-C(4)-C(5) 122.51(19)

C(9)-C(4)-N(1) 119.11(17)

C(5)-C(4)-N(1) 118.30(18)

C(6)-C(5)-C(4) 117.3(2)

C(6)-C(5)-C(10) 119.88(19)

C(4)-C(5)-C(10) 122.82(18)

C(7)-C(6)-C(5) 121.1(2)

C(7)-C(6)-H(6) 119.8(11)

C(5)-C(6)-H(6) 119.1(11)

C(6)-C(7)-C(8) 120.4(2)

C(6)-C(7)-H(7) 120.6(11)

C(8)-C(7)-H(7) 119.0(11)

C(7)-C(8)-C(9) 121.1(2)

C(7)-C(8)-H(8) 120.9(11)

C(9)-C(8)-H(8) 117.9(11)

C(4)-C(9)-C(8) 117.55(19)

C(4)-C(9)-C(13) 121.42(18)

C(8)-C(9)-C(13) 121.01(19)

C(5)-C(10)-C(12) 111.52(19)

C(5)-C(10)-C(11) 112.0(2)

C(12)-C(10)-C(11) 110.4(2)

C(5)-C(10)-H(10) 106.5(11)

C(12)-C(10)-H(10) 106.6(11)

C(11)-C(10)-H(10) 109.6(11)

C(10)-C(11)-H(11A) 114.1(12)

C(10)-C(11)-H(11B) 109.9(13)

H(11A)-C(11)-H(11B) 107.8(18)

C(10)-C(11)-H(11C) 112.4(12)

H(11A)-C(11)-H(11C) 106.2(17)

H(11B)-C(11)-H(11C) 106.1(17)

C(10)-C(12)-H(12A) 108.9(11)

C(10)-C(12)-H(12B) 111.1(11)

H(12A)-C(12)-H(12B) 109.7(16)

C(10)-C(12)-H(12C) 114.0(12)

H(12A)-C(12)-H(12C) 107.2(17)

H(12B)-C(12)-H(12C) 105.8(17)

C(9)-C(13)-C(15) 113.29(19)

C(9)-C(13)-C(14) 109.7(2)

C(15)-C(13)-C(14) 111.3(2)

C(9)-C(13)-H(13) 109.8(10)

C(15)-C(13)-H(13) 105.4(11)

C(14)-C(13)-H(13) 107.1(11)

C(13)-C(14)-H(14A) 110.8(14)

C(13)-C(14)-H(14B) 112.7(13)

H(14A)-C(14)-H(14B) 108.4(19)

C(13)-C(14)-H(14C) 113.5(12)

H(14A)-C(14)-H(14C) 104.2(19)

H(14B)-C(14)-H(14C) 106.9(18)

C(13)-C(15)-H(15A) 108.8(13)

C(13)-C(15)-H(15B) 113.9(13)

H(15A)-C(15)-H(15B) 109.6(18)

C(13)-C(15)-H(15C) 109.9(14)

H(15A)-C(15)-H(15C) 106.9(19)

H(15B)-C(15)-H(15C) 107.6(19)

N(1)-C(16)-C(17) 128.7(2)

N(1)-C(16)-H(16) 115.4(11)

C(17)-C(16)-H(16) 115.8(11)

C(18)-C(17)-C(22) 119.83(19)

C(18)-C(17)-C(16) 118.5(2)

C(22)-C(17)-C(16) 121.65(19)

C(19)-C(18)-C(17) 121.7(2)

C(19)-C(18)-H(18) 118.7(12)

C(17)-C(18)-H(18) 119.6(12)

C(20)-C(19)-C(18) 118.8(2)

C(20)-C(19)-H(19) 119.8(12)

C(18)-C(19)-H(19) 121.4(12)

C(21)-C(20)-C(19) 122.5(2)

C(21)-C(20)-H(20) 118.6(12)

C(19)-C(20)-H(20) 118.9(12)

C(20)-C(21)-C(22) 119.2(2)

C(20)-C(21)-C(23) 120.25(19)

C(22)-C(21)-C(23) 120.50(18)

O-C(22)-C(17) 122.11(18)

O-C(22)-C(21) 119.91(18)

C(17)-C(22)-C(21) 117.97(19)

C(24)-C(23)-C(36) 119.76(18)

C(24)-C(23)-C(21) 120.72(18)

C(36)-C(23)-C(21) 119.52(18)

C(23)-C(24)-C(29) 119.74(18)

C(23)-C(24)-C(25) 123.20(19)

C(29)-C(24)-C(25) 117.04(19)

C(26)-C(25)-C(24) 121.8(2)

C(26)-C(25)-H(25) 119.7(11)

C(24)-C(25)-H(25) 118.4(11)

C(25)-C(26)-C(27) 120.8(2)

C(25)-C(26)-H(26) 119.6(12)

C(27)-C(26)-H(26) 119.6(12)

C(28)-C(27)-C(26) 119.8(2)

C(28)-C(27)-H(27) 119.5(12)

C(26)-C(27)-H(27) 120.7(12)

C(27)-C(28)-C(29) 121.5(2)

C(27)-C(28)-H(28) 122.4(12)

C(29)-C(28)-H(28) 116.1(12)

C(30)-C(29)-C(24) 119.18(19)

C(30)-C(29)-C(28) 121.8(2)

C(24)-C(29)-C(28) 119.0(2)

C(31)-C(30)-C(29) 122.3(2)

C(31)-C(30)-H(30) 118.2(11)

C(29)-C(30)-H(30) 119.5(11)

C(30)-C(31)-C(36) 119.13(19)

C(30)-C(31)-C(32) 122.0(2)

C(36)-C(31)-C(32) 118.9(2)

C(33)-C(32)-C(31) 122.0(2)

C(33)-C(32)-H(32) 121.1(13)

C(31)-C(32)-H(32) 116.8(13)

C(32)-C(33)-C(34) 119.4(2)

C(32)-C(33)-H(33) 121.2(11)

C(34)-C(33)-H(33) 119.3(11)

C(35)-C(34)-C(33) 121.2(2)

C(35)-C(34)-H(34) 120.4(12)

C(33)-C(34)-H(34) 118.4(12)

C(34)-C(35)-C(36) 121.5(2)

C(34)-C(35)-H(35) 120.1(11)

C(36)-C(35)-H(35) 118.4(11)

C(23)-C(36)-C(35) 123.12(19)

C(23)-C(36)-C(31) 119.90(19)

C(35)-C(36)-C(31) 116.96

____________________________________

**Table 5. Anisotropic displacement parameters (Å2x 104** **) for 7 (CCDC No. 139263). The anisotropic displacement factor exponent takes the form: -2p2** **[ h2** **a*2U 11 + ... + 2 h k a* b* U12 ]**

______________________________________________________________________________

U11 U22 U33 U23 U13 U12

______________________________________________________________________________

Ni 176(2) 243(2) 237(2) -13(1) 7(1) 7(1)

N(1) 177(10) 168(10) 243(11) -6(8) -15(8) -13(7)

N(2) 245(11) 297(11) 245(11) 1(9) -33(9) -10(9)

O 190(8) 254(8) 205(9) -17(7) 11(7) 8(6)

C(1) 241(14) 323(15) 255(16) -8(13) 44(12) 2(12)

C(2) 274(14) 273(14) 237(14) 18(11) -27(12) -15(11)

C(3) 311(16) 388(18) 328(17) 8(15) 79(14) 40(13)

C(4) 155(12) 258(13) 225(12) -70(10) 21(9) -3(9)

C(5) 171(12) 257(13) 215(13) -51(10) 26(10) -4(10)

C(6) 247(14) 253(13) 288(14) -76(12) 55(11) -57(11)

C(7) 180(13) 382(14) 277(15) -105(12) -34(11) -5(12)

C(8) 233(13) 257(14) 276(14) -32(12) -41(11) 47(10)

C(9) 173(12) 253(13) 265(14) -64(11) -6(10) 15(9)

C(10) 179(14) 291(14) 324(15) -1(11) 24(11) -53(10)

C(11) 368(18) 405(18) 312(17) 48(14) -12(14) -70(14)

C(12) 277(16) 252(15) 398(19) 18(13) -7(14) -33(12)

C(13) 194(14) 249(13) 417(15) 0(12) -52(12) 16(10)

C(14) 289(17) 293(16) 640(20) -112(15) -55(15) 3(13)

C(15) 328(17) 339(17) 550(20) 89(15) -91(15) -54(14)

C(16) 184(13) 162(12) 312(16) -2(11) 59(12) -6(10)

C(17) 175(13) 166(11) 241(13) 16(10) 10(10) 13(9)

C(18) 200(14) 239(12) 272(15) 20(11) 54(11) -4(10)

C(19) 285(15) 306(14) 193(15) -4(11) -12(12) 17(10)

C(20) 201(14) 237(13) 303(16) 14(11) -57(12) -3(10)

C(21) 204(13) 154(11) 245(14) 22(10) -1(10) 9(9)

C(22) 219(13) 140(12) 254(14) 10(10) -10(11) 15(9)

C(23) 163(12) 246(12) 209(13) 35(10) -50(10) 29(10)

C(24) 179(12) 253(13) 211(13) 29(10) -53(10) 19(10)

C(25) 182(14) 295(14) 315(15) 15(11) -15(12) 19(11)

C(26) 243(14) 250(14) 429(16) -21(13) -56(12) 27(12)

C(27) 300(15) 323(15) 378(16) -70(12) -27(12) 104(12)

C(28) 219(14) 376(16) 303(15) 4(12) 13(12) 65(12)

C(29) 197(12) 293(14) 217(13) 15(11) -26(10) 57(10)

C(30) 137(13) 382(15) 217(13) 54(11) 5(10) 1(11)

C(31) 189(12) 265(13) 230(13) 42(11) -37(10) 13(10)

C(32) 199(14) 359(15) 313(15) 64(12) 15(12) -43(12)

C(33) 299(15) 285(14) 374(15) 45(12) -12(13) -85(12)

C(34) 293(15) 236(14) 338(16) -15(12) -18(12) 24(12)

C(35) 189(14) 306(15) 271(14) 16(11) -15(11) 13(11)

C(36) 169(12) 264(13) 206(13) 34(10) -52(10) 23(10)

______________________________________________________________________________

**Table 6. Hydrogen coordinates ( x 104) and isotropic displacement parameters (Å2x 10** **3) for 7 (CCDC No. 139263).**

________________________________________________________________________________

x y z U**iso**

________________________________________________________________________________

H(1A) 2292(10) 1248(13) 5190(9) 21(6)

H(1B) 2877(11) 485(15) 5012(9) 38(6)

H(1C) 2868(11) 1464(13) 4663(8) 26(6)

H(3A) -275(12) 836(16) 5655(11) 55(8)

H(3B) 129(12) 1825(16) 5660(11) 49(8)

H(3C) -440(13) 1538(16) 5127(11) 57(8)

H(6) 4755(10) 1771(12) 3717(8) 19(5)

H(7) 5347(11) 592(12) 4260(8) 25(5)

H(8) 4678(10) -731(12) 4536(8) 18(5)

H(10) 2875(10) 1849(11) 3374(7) 6(5)

H(11A) 3442(11) 1428(16) 2457(9) 41(7)

H(11B) 4093(12) 2060(14) 2664(9) 33(7)

H(11C) 3377(10) 2515(15) 2492(9) 30(6)

H(12A) 4034(12) 3044(13) 3593(8) 29(6)

H(12B) 3198(11) 3370(13) 3489(8) 22(5)

H(12C) 3424(11) 2876(14) 4087(10) 39(7)

H(13) 2776(10) -1120(12) 4346(8) 17(5)

H(14A) 3917(15) -2118(16) 3793(10) 57(8)

H(14B) 3143(12) -2530(15) 3917(9) 34(6)

H(14C) 3244(12) -1755(15) 3427(10) 42(7)

H(15A) 4002(13) -1849(15) 4922(9) 43(7)

H(15B) 3446(12) -1145(17) 5279(11) 56(8)

H(15C) 3190(13) -2147(17) 5033(10) 53(7)

H(16) 2841(10) 15(11) 2904(8) 13(5)

H(18) 2153(10) -136(12) 2029(8) 21(6)

H(19) 1051(10) -295(12) 1538(9) 18(6)

H(20) -45(10) -233(12) 2060(8) 19(6)

H(25) 249(10) 1630(11) 3332(8) 14(5)

H(26) -204(11) 2913(13) 3792(8) 23(6)

H(27) -1346(11) 2862(14) 4315(9) 29(6)

H(28) -2010(11) 1477(13) 4307(8) 26(6)

H(30) -2162(10) -113(12) 3987(8) 14(5)

H(32) -2334(11) -1700(13) 3664(9) 24(6)

H(33) -1959(10) -3062(13) 3214(8) 26(6)

H(34) -815(10) -3014(13) 2748(8) 18(6)

H(35) -97(10) -1718(11) 2711(8) 13(5)

________________________________________________________________________________

**X-Ray Diffraction Analysis of**

**(Anthr,HSal)2Ni · 2 CH3CN 10 (CCDC No. 141446)**

**Table 1. Crystal data and structure refinement for 10 (CCDC No. 141446)**

Empirical formula C66H60N2NiO2 (CH3C**≡**N)2

Formula weight 971.91 (82.06)

Crystallization Solvent Acetonitrile

Crystal Habit Thin chunk

Crystal size 0.259 x 0.185 x 0.148 mm3

Crystal color Dark brown

# Data Collection

Preliminary Photos Rotation

Type of diffractometer CCD area detector

Wavelength 0.71073 Å MoKa

Data Collection Temperature 93 K

 range for 5769 reflections used

in lattice determination 2.35 to 26.39°

Unit cell dimensions a = 10.8701(8) Å

b = 28.890(2) Å b= 97.8390(10)°

c = 18.3122(14) Å

Volume 5697.0(7) Å3

Z 4

Crystal system Monoclinic

Space group P21/c

Density (calculated) 1.229 Mg/m3

F(000) 2232

Data collection program Bruker SMART

 range for data collection 1.80 to 28.58°

Completeness to  = 28.58° 94.5 %

Index ranges -14  h  14, -38  k  38, -24  l  24

Data collection scan type  scans at eight  settings

Data reduction program Bruker SAINT v 6.2

Reflections collected 104083

Independent reflections 13770 [Rint= 0.0967]

Absorption coefficient 0.390 mm-1

Absorption correction None

**Table 1 (cont.)**

**Structure Solution and Refinement**

Structure solution program SHELXS-97 (Sheldrick, 1990)

Primary solution method Patterson method

Secondary solution method Difference Fourier map

Hydrogen placement Difference Fourier map

Structure refinement program SHELXL-97 (Sheldrick, 1997)

Refinement method Full matrix least-squares on F2

Data / restraints / parameters 13770 / 15 / 901

Treatment of hydrogen atoms Unrestrained

Goodness-of-fit on F2 1.499

Final R indices [I>2s(I), 8132 reflections] R1 = 0.0499, *w*R2 = 0.0778

R indices (all data) R1 = 0.0985, *w*R2 = 0.0818

Type of weighting scheme used Sigma

Weighting scheme used *w*=1/2(Fo2)

Max shift/error 0.001

Average shift/error 0.000

Largest diff. peak and hole 0.689 and -0.860 e.Å-3

# Special Refinement Details

The crystals contain solvent at two sites. At one site (solvent 100) the solvent is well behaved and the has been refined anisotropically without any restraints whatsoever (including hydrogen atoms). At the second site (solvents 200 and 300) there is disorder with respect to the orientation of the nitrile in the two molecules which occupy the site. Therefore these two aetonitrile molecules were refined as rigid bodies with the total population of the site set equal to one.

Additionally, disorder is present in the isopropyl group which is bonded to C9, labeled C28, C29 and C30. The disorder is a rotation about the C9-C28 bond, resulting in alternate orientations for the methyl groups C29 and C30 with the maps indicating an approximate 2:1 ratio for the two orientations. This disorder was successfully modeled with riding hydrogen atoms and a light restraint on the isopropyl geometry. The refined ratio of occupancies for the two orientations was 0.69:0.31 which is in excellent agreement with the density maps. Please refer to the enclosed figures for density maps showing this disorder.

Refinement of F2 against ALL reflections. The weighted R-factor (*w*R) and goodness of fit (S) are based on F2, conventional R-factors (R) are based on F, with F set to zero for negative F2. The threshold expression of F2 > 2( F2) is used only for calculating R-factors(gt) etc. and is not relevant to the choice of reflections for refinement. R-factors based on F2 are statistically about twice as large as those based on F, and R-factors based on ALL data will be even larger.

All esds (except the esd in the dihedral angle between two l.s. planes) are estimated using the full covariance matrix. The cell esds are taken into account individually in the estimation of esds in distances, angles and torsion angles; correlations between esds in cell parameters are only used when they are defined by crystal symmetry. An approximate (isotropic) treatment of cell esds is used for estimating esds involving l.s. planes.

**Table 2. Atomic coordinates ( x 104) and equivalent isotropic displacement parameters (Å2x 103) for 10 (CCDC No. 141446). U(eq) is defined as the trace of the orthogonalized Uij tensor.**

________________________________________________________________________________

x y z U**eq** Occ

________________________________________________________________________________

Ni 7472(1) 8252(1) 7815(1) 20(1) 1

O(1) 6917(2) 8846(1) 7597(2) 23(1) 1

O(2) 7619(2) 7674(1) 8235(1) 20(1) 1

N(1) 6575(3) 7993(1) 6952(2) 23(1) 1

N(2) 8919(3) 8488(1) 8391(2) 20(1) 1

C(1) 6389(4) 9010(1) 6967(2) 22(1) 1

C(2) 6038(4) 9485(1) 6908(2) 24(1) 1

C(3) 5568(4) 9661(2) 6227(3) 34(1) 1

C(4) 5387(5) 9392(2) 5590(3) 45(1) 1

C(5) 5646(5) 8927(2) 5655(3) 42(1) 1

C(6) 6120(4) 8733(1) 6333(2) 28(1) 1

C(7) 6219(4) 8239(2) 6371(2) 28(1) 1

C(8) 6443(4) 7496(1) 6831(2) 24(1) 1

C(9) 5275(4) 7296(2) 6819(2) 31(1) 1

C(10) 5168(5) 6824(2) 6662(3) 36(1) 1

C(11) 6170(5) 6570(2) 6513(3) 34(1) 1

C(12) 7311(5) 6777(2) 6529(2) 32(1) 1

C(13) 7486(4) 7242(1) 6697(2) 26(1) 1

C(14) 6089(4) 9787(1) 7572(2) 26(1) 1

C(15) 6844(4) 10182(1) 7653(3) 30(1) 1

C(16) 7617(4) 10318(2) 7118(3) 38(1) 1

C(17) 8242(5) 10724(2) 7173(4) 47(2) 1

C(18) 8191(5) 11018(2) 7783(4) 57(2) 1

C(19) 7515(5) 10901(2) 8317(4) 48(2) 1

C(20) 6777(4) 10487(2) 8266(3) 37(1) 1

C(21) 5978(5) 10386(2) 8768(3) 37(1) 1

C(22) 5178(4) 10010(2) 8678(2) 31(1) 1

C(23) 4238(5) 9940(2) 9138(3) 40(1) 1

C(24) 3395(5) 9599(2) 9009(3) 43(1) 1

C(25) 3436(5) 9295(2) 8406(3) 38(1) 1

C(26) 4327(4) 9342(2) 7961(3) 30(1) 1

C(27) 5236(4) 9702(1) 8072(2) 27(1) 1

C(28) 4171(4) 7571(2) 6942(3) 56(2) 1

C(29) 4190(5) 7771(2) 7702(3) 36(2) 0.693(8)

C(30) 2959(5) 7426(3) 6557(4) 64(3) 0.693(8)

C(29B) 3715(13) 7424(7) 7650(6) 68(7) 0.307(8)

C(30B) 3205(10) 7663(6) 6314(5) 33(5) 0.307(8)

C(31) 8767(4) 7469(2) 6693(2) 29(1) 1

C(32) 9806(5) 7161(2) 7045(3) 37(1) 1

C(33) 8899(6) 7643(2) 5950(3) 44(1) 1

C(34) 8554(4) 7496(1) 8668(2) 18(1) 1

C(35) 8479(4) 7028(1) 8922(2) 20(1) 1

C(36) 9499(4) 6833(1) 9338(2) 22(1) 1

C(37) 10602(4) 7073(2) 9527(3) 27(1) 1

C(38) 10683(4) 7525(2) 9319(2) 26(1) 1

C(39) 9663(4) 7742(1) 8896(2) 19(1) 1

C(40) 9768(4) 8225(1) 8739(2) 20(1) 1

C(41) 9256(3) 8976(1) 8371(2) 20(1) 1

C(42) 9671(4) 9153(1) 7740(2) 22(1) 1

C(43) 10048(4) 9615(2) 7765(3) 27(1) 1

C(44) 9988(4) 9885(2) 8380(3) 28(1) 1

C(45) 9545(4) 9702(1) 8987(3) 24(1) 1

C(46) 9168(4) 9239(1) 9002(2) 21(1) 1

C(47) 7316(3) 6751(1) 8736(2) 20(1) 1

C(48) 6219(4) 6889(1) 8996(2) 22(1) 1

C(49) 6157(4) 7284(1) 9457(2) 22(1) 1

C(50) 5098(4) 7398(2) 9730(3) 29(1) 1

C(51) 4004(5) 7138(2) 9542(3) 39(1) 1

C(52) 4004(4) 6761(2) 9109(3) 38(1) 1

C(53) 5113(4) 6615(1) 8828(2) 27(1) 1

C(54) 5152(4) 6210(2) 8428(3) 31(1) 1

C(55) 6247(4) 6060(1) 8189(2) 27(1) 1

C(56) 6300(5) 5639(2) 7793(3) 34(1) 1

C(57) 7346(5) 5496(2) 7551(3) 36(1) 1

C(58) 8431(5) 5760(2) 7691(3) 33(1) 1

C(59) 8432(4) 6168(2) 8065(2) 27(1) 1

C(60) 7351(4) 6335(1) 8341(2) 22(1) 1

C(61) 9748(4) 8861(2) 7062(2) 29(1) 1

C(62) 9396(6) 9123(2) 6340(3) 42(1) 1

C(63) 11019(6) 8640(2) 7083(4) 49(2) 1

C(64) 8724(4) 9045(2) 9687(2) 25(1) 1

C(65) 7822(5) 9365(2) 10001(3) 32(1) 1

C(66) 9822(5) 8940(2) 10282(3) 33(1) 1

C(101) 5317(5) 8561(2) 9464(4) 54(2) 1

C(100) 4044(5) 8491(2) 9625(3) 46(2) 1

N(100) 3053(4) 8437(1) 9742(3) 60(1) 1

N(200) 7895 10019 4474 112 0.24

C(200) 8384 10296 4862 169 0.24

C(201) 9062 10615 5379 131 0.24

N(300) 8898 10441 5371 116 0.76

C(300) 8496 10130 5025 102 0.76

C(301) 8044 9740 4568 83 0.76

________________________________________________________________________________

**Table 3. Selected bond lengths [Å] and angles [°] for 10 (CCDC No. 141446).**

_______________________________________________________________________________

Ni-O(2) 1.836(3)

Ni-O(1) 1.844(2)

Ni-N(1) 1.895(3)

Ni-N(2) 1.896(3)

O(2)-Ni-O(1) 160.71(12)

O(2)-Ni-N(1) 89.69(13)

O(1)-Ni-N(1) 94.10(13)

O(2)-Ni-N(2) 94.32(12)

O(1)-Ni-N(2) 90.52(12)

N(1)-Ni-N(2) 154.05(14)

_______________________________________________________________________________

**Table 4. Bond lengths [Å] and angles [°] for 10 (CCDC No. 141446).**

_______________________________________________________________________________

Ni-O(2) 1.836(3)

Ni-O(1) 1.844(2)

Ni-N(1) 1.895(3)

Ni-N(2) 1.896(3)

O(1)-C(1) 1.305(4)

O(2)-C(34) 1.306(4)

N(1)-C(7) 1.295(5)

N(1)-C(8) 1.457(5)

N(2)-C(40) 1.294(5)

N(2)-C(41) 1.459(4)

C(1)-C(6) 1.407(5)

C(1)-C(2) 1.427(5)

C(2)-C(3) 1.379(6)

C(2)-C(14) 1.490(5)

C(3)-C(4) 1.392(6)

C(3)-H(3) 0.97(4)

C(4)-C(5) 1.375(6)

C(4)-H(4) 0.95(4)

C(5)-C(6) 1.394(6)

C(5)-H(5) 0.97(4)

C(6)-C(7) 1.431(6)

C(7)-H(7) 0.99(3)

C(8)-C(9) 1.392(5)

C(8)-C(13) 1.399(5)

C(9)-C(10) 1.396(6)

C(9)-C(28) 1.483(6)

C(10)-C(11) 1.371(6)

C(10)-H(10) 0.99(4)

C(11)-C(12) 1.374(6)

C(11)-H(11) 0.93(4)

C(12)-C(13) 1.384(6)

C(12)-H(12) 0.92(4)

C(13)-C(31) 1.541(6)

C(14)-C(15) 1.403(5)

C(14)-C(27) 1.410(6)

C(15)-C(16) 1.430(7)

C(15)-C(20) 1.436(6)

C(16)-C(17) 1.353(6)

C(16)-H(16) 0.93(4)

C(17)-C(18) 1.411(8)

C(17)-H(17) 0.96(4)

C(18)-C(19) 1.344(8)

C(18)-H(18) 0.87(4)

C(19)-C(20) 1.436(7)

C(19)-H(19) 0.97(4)

C(20)-C(21) 1.380(7)

C(21)-C(22) 1.387(6)

C(21)-H(21) 0.94(4)

C(22)-C(23) 1.424(6)

C(22)-C(27) 1.430(6)

C(23)-C(24) 1.344(7)

C(23)-H(23) 0.98(4)

C(24)-C(25) 1.415(7)

C(24)-H(24) 0.98(5)

C(25)-C(26) 1.354(6)

C(25)-H(25) 0.96(4)

C(26)-C(27) 1.430(6)

C(26)-H(26) 1.02(4)

C(28)-C(30) 1.468(5)

C(28)-C(29) 1.505(5)

C(28)-H(28) 0.9800

C(28)-C(30B) 1.4719(47)

C(28)-C(29B) 1.5095(47)

C(28)-H(28B) 0.9800

C(29)-H(29A) 0.9600

C(29)-H(29B) 0.9600

C(29)-H(29C) 0.9600

C(30)-H(30A) 0.9600

C(30)-H(30B) 0.9600

C(30)-H(30C) 0.9600

C(29B)-H(29D) 0.9600

C(29B)-H(29E) 0.9600

C(29B)-H(29F) 0.9600

C(30B)-H(30D) 0.9600

C(30B)-H(30E) 0.9600

C(30B)-H(30F) 0.9600

C(31)-C(33) 1.476(5)

C(31)-C(32) 1.511(5)

C(31)-H(31) 0.97(3)

C(32)-H(32A) 1.06(5)

C(32)-H(32B) 0.92(4)

C(32)-H(32C) 0.95(4)

C(33)-H(33A) 1.06(5)

C(33)-H(33B) 1.00(4)

C(33)-H(33C) 0.92(4)

C(34)-C(39) 1.413(5)

C(34)-C(35) 1.436(5)

C(35)-C(36) 1.377(5)

C(35)-C(47) 1.496(5)

C(36)-C(37) 1.388(5)

C(36)-H(36) 0.93(3)

C(37)-C(38) 1.366(5)

C(37)-H(37) 0.89(3)

C(38)-C(39) 1.410(5)

C(38)-H(38) 0.99(3)

C(39)-C(40) 1.431(5)

C(40)-H(40) 1.00(3)

C(41)-C(42) 1.394(5)

C(41)-C(46) 1.396(5)

C(42)-C(43) 1.396(5)

C(42)-C(61) 1.513(6)

C(43)-C(44) 1.377(6)

C(43)-H(43) 0.95(3)

C(44)-C(45) 1.376(6)

C(44)-H(44) 0.97(3)

C(45)-C(46) 1.401(5)

C(45)-H(45) 0.92(3)

C(46)-C(64) 1.512(6)

C(47)-C(48) 1.401(5)

C(47)-C(60) 1.405(5)

C(48)-C(49) 1.427(5)

C(48)-C(53) 1.438(5)

C(49)-C(50) 1.356(5)

C(49)-H(49) 0.98(3)

C(50)-C(51) 1.409(6)

C(50)-H(50) 0.96(3)

C(51)-C(52) 1.347(6)

C(51)-H(51) 0.96(4)

C(52)-C(53) 1.438(6)

C(52)-H(52) 1.02(4)

C(53)-C(54) 1.384(6)

C(54)-C(55) 1.392(6)

C(54)-H(54) 1.02(4)

C(55)-C(56) 1.422(6)

C(55)-C(60) 1.435(5)

C(56)-C(57) 1.341(6)

C(56)-H(56) 0.92(4)

C(57)-C(58) 1.399(6)

C(57)-H(57) 0.94(3)

C(58)-C(59) 1.362(6)

C(58)-H(58) 0.98(4)

C(59)-C(60) 1.426(5)

C(59)-H(59) 0.98(4)

C(61)-C(63) 1.519(7)

C(61)-C(62) 1.526(6)

C(61)-H(61) 0.98(4)

C(62)-H(62A) 1.01(5)

C(62)-H(62B) 0.98(4)

C(62)-H(62C) 1.05(4)

C(63)-H(63A) 1.00(5)

C(63)-H(63B) 0.99(5)

C(63)-H(63C) 0.97(4)

C(64)-C(65) 1.517(6)

C(64)-C(66) 1.532(6)

C(64)-H(64) 0.88(4)

C(65)-H(65A) 0.95(3)

C(65)-H(65B) 1.06(4)

C(65)-H(65C) 1.01(4)

C(66)-H(66A) 1.02(4)

C(66)-H(66B) 1.00(4)

C(66)-H(66C) 0.95(4)

C(101)-C(100) 1.467(7)

C(101)-H(10A) 1.05(6)

C(101)-H(10B) 0.97(5)

C(101)-H(10C) 1.09(6)

C(100)-N(100) 1.136(6)

N(200)-C(200) 1.1514

N(200)-H(30D) 1.2557

N(200)-H(30F) 1.0507

C(200)-C(201) 1.4491

C(201)-H(20A) 0.9600

C(201)-H(20B) 0.9600

C(201)-H(20C) 0.9600

N(300)-C(300) 1.1500

N(300)-H(20A) 1.0623

N(300)-H(20B) 1.0809

N(300)-H(20C) 1.4475

C(300)-C(301) 1.4500

C(301)-H(30D) 0.9600

C(301)-H(30E) 0.9600

C(301)-H(30F) 0.9600

O(2)-Ni-O(1) 160.71(12)

O(2)-Ni-N(1) 89.69(13)

O(1)-Ni-N(1) 94.10(13)

O(2)-Ni-N(2) 94.32(12)

O(1)-Ni-N(2) 90.52(12)

N(1)-Ni-N(2) 154.05(14)

C(1)-O(1)-Ni 128.3(3)

C(34)-O(2)-Ni 128.9(2)

C(7)-N(1)-C(8) 113.9(4)

C(7)-N(1)-Ni 121.9(3)

C(8)-N(1)-Ni 123.1(3)

C(40)-N(2)-C(41) 114.5(3)

C(40)-N(2)-Ni 123.0(3)

C(41)-N(2)-Ni 121.7(2)

O(1)-C(1)-C(6) 122.7(4)

O(1)-C(1)-C(2) 119.8(4)

C(6)-C(1)-C(2) 117.5(4)

C(3)-C(2)-C(1) 119.0(4)

C(3)-C(2)-C(14) 119.4(4)

C(1)-C(2)-C(14) 121.4(4)

C(2)-C(3)-C(4) 123.1(5)

C(2)-C(3)-H(3) 118(2)

C(4)-C(3)-H(3) 119(2)

C(5)-C(4)-C(3) 117.9(5)

C(5)-C(4)-H(4) 119(2)

C(3)-C(4)-H(4) 122(2)

C(4)-C(5)-C(6) 121.1(5)

C(4)-C(5)-H(5) 121(2)

C(6)-C(5)-H(5) 118(2)

C(5)-C(6)-C(1) 121.1(4)

C(5)-C(6)-C(7) 117.4(4)

C(1)-C(6)-C(7) 121.3(4)

N(1)-C(7)-C(6) 127.0(4)

N(1)-C(7)-H(7) 117(2)

C(6)-C(7)-H(7) 116(2)

C(9)-C(8)-C(13) 122.6(4)

C(9)-C(8)-N(1) 118.8(4)

C(13)-C(8)-N(1) 118.5(4)

C(8)-C(9)-C(10) 117.3(4)

C(8)-C(9)-C(28) 122.1(4)

C(10)-C(9)-C(28) 120.6(4)

C(11)-C(10)-C(9) 121.2(5)

C(11)-C(10)-H(10) 121(2)

C(9)-C(10)-H(10) 118(2)

C(10)-C(11)-C(12) 120.1(5)

C(10)-C(11)-H(11) 120(2)

C(12)-C(11)-H(11) 120(2)

C(11)-C(12)-C(13) 121.6(5)

C(11)-C(12)-H(12) 120(2)

C(13)-C(12)-H(12) 118(2)

C(12)-C(13)-C(8) 117.1(4)

C(12)-C(13)-C(31) 120.6(4)

C(8)-C(13)-C(31) 122.1(4)

C(15)-C(14)-C(27) 119.9(4)

C(15)-C(14)-C(2) 121.2(4)

C(27)-C(14)-C(2) 118.4(4)

C(14)-C(15)-C(16) 122.8(4)

C(14)-C(15)-C(20) 119.4(5)

C(16)-C(15)-C(20) 117.6(4)

C(17)-C(16)-C(15) 121.6(6)

C(17)-C(16)-H(16) 119(3)

C(15)-C(16)-H(16) 120(3)

C(16)-C(17)-C(18) 120.4(6)

C(16)-C(17)-H(17) 116(3)

C(18)-C(17)-H(17) 123(3)

C(19)-C(18)-C(17) 120.6(6)

C(19)-C(18)-H(18) 122(3)

C(17)-C(18)-H(18) 118(3)

C(18)-C(19)-C(20) 121.2(6)

C(18)-C(19)-H(19) 126(3)

C(20)-C(19)-H(19) 113(3)

C(21)-C(20)-C(19) 122.0(5)

C(21)-C(20)-C(15) 119.6(4)

C(19)-C(20)-C(15) 118.3(5)

C(20)-C(21)-C(22) 121.9(5)

C(20)-C(21)-H(21) 120(2)

C(22)-C(21)-H(21) 118(2)

C(21)-C(22)-C(23) 122.0(5)

C(21)-C(22)-C(27) 119.0(5)

C(23)-C(22)-C(27) 118.8(5)

C(24)-C(23)-C(22) 121.8(5)

C(24)-C(23)-H(23) 124(3)

C(22)-C(23)-H(23) 114(3)

C(23)-C(24)-C(25) 119.9(6)

C(23)-C(24)-H(24) 123(3)

C(25)-C(24)-H(24) 118(3)

C(26)-C(25)-C(24) 120.5(5)

C(26)-C(25)-H(25) 117(3)

C(24)-C(25)-H(25) 122(3)

C(25)-C(26)-C(27) 121.6(5)

C(25)-C(26)-H(26) 119(2)

C(27)-C(26)-H(26) 119(2)

C(14)-C(27)-C(22) 120.0(4)

C(14)-C(27)-C(26) 122.4(4)

C(22)-C(27)-C(26) 117.4(4)

C(30)-C(28)-C(9) 117.7(4)

C(30)-C(28)-C(29) 117.0(4)

C(9)-C(28)-C(29) 115.9(4)

C(30)-C(28)-H(28) 100.3

C(9)-C(28)-H(28) 100.3

C(29)-C(28)-H(28) 100.3

C(30B)-C(28)-C(9) 118.87(69)

C(30B)-C(28)-C(29B) 116.07(39)

C(9)-C(28)-C(29B) 110.29(74)

C(30B)-C(28)-H(28B) 103.00

C(9)-C(28)-H(28B) 103.00

C(29B)-C(28)-H(28B) 103.00

C(28)-C(29)-H(29A) 109.5

C(28)-C(29)-H(29B) 109.5

H(29A)-C(29)-H(29B) 109.5

C(28)-C(29)-H(29C) 109.5

H(29A)-C(29)-H(29C) 109.5

H(29B)-C(29)-H(29C) 109.5

C(28)-C(30)-H(30A) 109.5

C(28)-C(30)-H(30B) 109.5

H(30A)-C(30)-H(30B) 109.5

C(28)-C(30)-H(30C) 109.5

H(30A)-C(30)-H(30C) 109.5

H(30B)-C(30)-H(30C) 109.5

H(29D)-C(29B)-H(29E) 109.5

H(29D)-C(29B)-H(29F) 109.5

H(29E)-C(29B)-H(29F) 109.5

H(30D)-C(30B)-H(30E) 109.5

H(30D)-C(30B)-H(30F) 109.5

H(30E)-C(30B)-H(30F) 109.5

C(33)-C(31)-C(32) 115.6(4)

C(33)-C(31)-C(13) 110.5(4)

C(32)-C(31)-C(13) 111.7(4)

C(33)-C(31)-H(31) 110.8(18)

C(32)-C(31)-H(31) 107.0(18)

C(13)-C(31)-H(31) 100.1(18)

C(31)-C(32)-H(32A) 118(3)

C(31)-C(32)-H(32B) 108(2)

H(32A)-C(32)-H(32B) 112(4)

C(31)-C(32)-H(32C) 109(2)

H(32A)-C(32)-H(32C) 109(3)

H(32B)-C(32)-H(32C) 99(3)

C(31)-C(33)-H(33A) 122(3)

C(31)-C(33)-H(33B) 109(2)

H(33A)-C(33)-H(33B) 107(3)

C(31)-C(33)-H(33C) 112(2)

H(33A)-C(33)-H(33C) 105(4)

H(33B)-C(33)-H(33C) 100(3)

O(2)-C(34)-C(39) 122.9(3)

O(2)-C(34)-C(35) 119.6(3)

C(39)-C(34)-C(35) 117.5(3)

C(36)-C(35)-C(34) 119.1(4)

C(36)-C(35)-C(47) 119.9(4)

C(34)-C(35)-C(47) 120.9(3)

C(35)-C(36)-C(37) 122.5(4)

C(35)-C(36)-H(36) 117(2)

C(37)-C(36)-H(36) 120(2)

C(38)-C(37)-C(36) 119.6(4)

C(38)-C(37)-H(37) 122(2)

C(36)-C(37)-H(37) 119(2)

C(37)-C(38)-C(39) 120.2(4)

C(37)-C(38)-H(38) 123(2)

C(39)-C(38)-H(38) 116(2)

C(38)-C(39)-C(34) 120.9(4)

C(38)-C(39)-C(40) 117.8(4)

C(34)-C(39)-C(40) 121.2(4)

N(2)-C(40)-C(39) 126.9(4)

N(2)-C(40)-H(40) 119.0(18)

C(39)-C(40)-H(40) 114.0(18)

C(42)-C(41)-C(46) 123.5(4)

C(42)-C(41)-N(2) 119.1(4)

C(46)-C(41)-N(2) 117.4(4)

C(41)-C(42)-C(43) 116.8(4)

C(41)-C(42)-C(61) 122.4(4)

C(43)-C(42)-C(61) 120.7(4)

C(44)-C(43)-C(42) 121.4(4)

C(44)-C(43)-H(43) 117(2)

C(42)-C(43)-H(43) 121(2)

C(45)-C(44)-C(43) 120.2(4)

C(45)-C(44)-H(44) 121(2)

C(43)-C(44)-H(44) 119(2)

C(44)-C(45)-C(46) 121.3(4)

C(44)-C(45)-H(45) 119(2)

C(46)-C(45)-H(45) 120(2)

C(41)-C(46)-C(45) 116.7(4)

C(41)-C(46)-C(64) 123.4(4)

C(45)-C(46)-C(64) 119.9(4)

C(48)-C(47)-C(60) 120.2(4)

C(48)-C(47)-C(35) 120.1(4)

C(60)-C(47)-C(35) 119.5(3)

C(47)-C(48)-C(49) 122.7(4)

C(47)-C(48)-C(53) 119.7(4)

C(49)-C(48)-C(53) 117.5(4)

C(50)-C(49)-C(48) 121.5(4)

C(50)-C(49)-H(49) 121(2)

C(48)-C(49)-H(49) 118(2)

C(49)-C(50)-C(51) 120.8(5)

C(49)-C(50)-H(50) 118(2)

C(51)-C(50)-H(50) 121(2)

C(52)-C(51)-C(50) 120.4(5)

C(52)-C(51)-H(51) 120(3)

C(50)-C(51)-H(51) 119(3)

C(51)-C(52)-C(53) 121.1(5)

C(51)-C(52)-H(52) 125(2)

C(53)-C(52)-H(52) 113(2)

C(54)-C(53)-C(52) 121.7(4)

C(54)-C(53)-C(48) 119.6(4)

C(52)-C(53)-C(48) 118.6(4)

C(53)-C(54)-C(55) 121.2(4)

C(53)-C(54)-H(54) 118(2)

C(55)-C(54)-H(54) 121(2)

C(54)-C(55)-C(56) 121.5(4)

C(54)-C(55)-C(60) 119.7(4)

C(56)-C(55)-C(60) 118.8(4)

C(57)-C(56)-C(55) 121.8(4)

C(57)-C(56)-H(56) 123(2)

C(55)-C(56)-H(56) 116(2)

C(56)-C(57)-C(58) 120.3(5)

C(56)-C(57)-H(57) 123(2)

C(58)-C(57)-H(57) 117(2)

C(59)-C(58)-C(57) 120.4(5)

C(59)-C(58)-H(58) 120(2)

C(57)-C(58)-H(58) 119(2)

C(58)-C(59)-C(60) 121.9(4)

C(58)-C(59)-H(59) 120(2)

C(60)-C(59)-H(59) 118(2)

C(47)-C(60)-C(59) 123.7(4)

C(47)-C(60)-C(55) 119.5(4)

C(59)-C(60)-C(55) 116.8(4)

C(42)-C(61)-C(63) 111.5(4)

C(42)-C(61)-C(62) 113.6(4)

C(63)-C(61)-C(62) 110.5(5)

C(42)-C(61)-H(61) 107(2)

C(63)-C(61)-H(61) 107(2)

C(62)-C(61)-H(61) 106(2)

C(61)-C(62)-H(62A) 114(3)

C(61)-C(62)-H(62B) 111(3)

H(62A)-C(62)-H(62B) 108(4)

C(61)-C(62)-H(62C) 116(2)

H(62A)-C(62)-H(62C) 106(3)

H(62B)-C(62)-H(62C) 101(3)

C(61)-C(63)-H(63A) 114(3)

C(61)-C(63)-H(63B) 109(3)

H(63A)-C(63)-H(63B) 109(4)

C(61)-C(63)-H(63C) 108(3)

H(63A)-C(63)-H(63C) 109(4)

H(63B)-C(63)-H(63C) 107(4)

C(46)-C(64)-C(65) 112.6(4)

C(46)-C(64)-C(66) 111.0(4)

C(65)-C(64)-C(66) 109.5(4)

C(46)-C(64)-H(64) 110(3)

C(65)-C(64)-H(64) 107(3)

C(66)-C(64)-H(64) 107(3)

C(64)-C(65)-H(65A) 108(2)

C(64)-C(65)-H(65B) 112(2)

H(65A)-C(65)-H(65B) 110(3)

C(64)-C(65)-H(65C) 111(2)

H(65A)-C(65)-H(65C) 112(3)

H(65B)-C(65)-H(65C) 104(3)

C(64)-C(66)-H(66A) 111(2)

C(64)-C(66)-H(66B) 110(2)

H(66A)-C(66)-H(66B) 104(3)

C(64)-C(66)-H(66C) 114(3)

H(66A)-C(66)-H(66C) 107(3)

H(66B)-C(66)-H(66C) 109(3)

C(100)-C(101)-H(10A) 109(3)

C(100)-C(101)-H(10B) 104(3)

H(10A)-C(101)-H(10B) 111(4)

C(100)-C(101)-H(10C) 106(3)

H(10A)-C(101)-H(10C) 109(4)

H(10B)-C(101)-H(10C) 117(4)

N(100)-C(100)-C(101) 179.2(7)

C(200)-N(200)-H(30D) 131.0

C(200)-N(200)-H(30F) 135.0

H(30D)-N(200)-H(30F) 85.2

N(200)-C(200)-C(201) 175.4

C(200)-C(201)-H(20A) 109.5

C(200)-C(201)-H(20B) 109.5

H(20A)-C(201)-H(20B) 109.5

C(200)-C(201)-H(20C) 109.5

H(20A)-C(201)-H(20C) 109.5

H(20B)-C(201)-H(20C) 109.5

C(300)-N(300)-H(20A) 124.0

C(300)-N(300)-H(20B) 137.0

H(20A)-N(300)-H(20B) 94.0

C(300)-N(300)-H(20C) 129.4

H(20A)-N(300)-H(20C) 75.6

H(20B)-N(300)-H(20C) 75.1

N(300)-C(300)-C(301) 177.0

C(300)-C(301)-H(30D) 109.5

C(300)-C(301)-H(30E) 109.5

H(30D)-C(301)-H(30E) 109.5

C(300)-C(301)-H(30F) 109.5

H(30D)-C(301)-H(30F) 109.5

H(30E)-C(301)-H(30F) 109.5

_______________________________________________________________________________

**Table 5. Anisotropic displacement parameters (Å2x 104** **) for 10 (CCDC No. 141446). The anisotropic displacement factor exponent takes the form: -2p2** **[ h2** **a*2U 11 + ... + 2 h k a* b* U12 ]**

______________________________________________________________________________

U11 U22 U33 U23 U13 U12

______________________________________________________________________________

Ni 209(3) 162(3) 233(3) -26(3) 3(2) 13(3)

O(1) 242(17) 188(16) 243(17) -8(13) -6(14) 36(13)

O(2) 187(16) 185(15) 228(17) -3(13) -20(13) -3(12)

N(1) 200(20) 210(20) 260(20) -34(17) -1(17) 30(16)

N(2) 210(20) 157(18) 240(20) 1(16) 34(16) 16(15)

C(1) 190(20) 220(20) 260(30) 0(20) 30(20) 21(19)

C(2) 250(30) 200(20) 270(30) 0(20) 10(20) 46(19)

C(3) 440(30) 240(30) 340(30) 30(20) 20(30) 60(20)

C(4) 670(40) 360(30) 300(30) 60(30) -30(30) 120(30)

C(5) 650(40) 340(30) 240(30) -40(30) -10(30) 90(30)

C(6) 370(30) 210(20) 240(30) 10(20) 20(20) 80(20)

C(7) 310(30) 290(30) 220(30) -50(20) -20(20) 40(20)

C(8) 280(30) 190(20) 230(30) -70(19) -50(20) 20(20)

C(9) 230(30) 290(30) 370(30) -100(20) -70(20) 60(20)

C(10) 330(30) 320(30) 410(30) -70(20) -40(20) -60(20)

C(11) 460(30) 200(30) 350(30) -90(20) -30(30) 10(20)

C(12) 380(30) 270(30) 310(30) -90(20) 30(20) 110(30)

C(13) 320(30) 240(30) 220(30) -40(20) 20(20) 50(20)

C(14) 250(30) 190(20) 310(30) 0(20) -50(20) 80(20)

C(15) 220(30) 230(30) 420(30) 10(20) -70(20) 60(20)

C(16) 260(30) 240(30) 610(40) 30(30) -60(30) 70(20)

C(17) 260(30) 340(30) 780(50) 130(30) -60(30) 20(30)

C(18) 310(40) 260(30) 1030(60) 30(40) -270(40) -30(30)

C(19) 300(30) 310(30) 760(50) -140(30) -190(30) 70(30)

C(20) 270(30) 210(30) 580(40) -70(30) -170(30) 70(20)

C(21) 390(30) 310(30) 370(30) -130(30) -120(30) 160(20)

C(22) 330(30) 290(30) 290(30) -30(20) -80(20) 150(20)

C(23) 450(40) 400(30) 320(30) -20(30) -10(30) 230(30)

C(24) 430(40) 470(40) 380(40) 90(30) 90(30) 190(30)

C(25) 370(30) 340(30) 420(30) 100(30) 50(30) 80(30)

C(26) 350(30) 230(30) 320(30) 20(20) 30(20) 70(20)

C(27) 280(30) 220(20) 290(30) 0(20) -40(20) 100(20)

C(28) 310(30) 550(40) 800(50) -260(30) 10(30) -30(30)

C(29) 290(40) 380(50) 450(50) 150(40) 170(30) 110(30)

C(30) 350(50) 900(80) 690(70) 70(60) 110(50) 120(50)

C(31) 330(30) 270(30) 270(30) -30(20) 70(20) 60(20)

C(32) 310(30) 370(30) 430(40) -10(30) 60(30) 90(30)

C(33) 470(40) 550(40) 310(30) 50(30) 110(30) -30(30)

C(34) 160(20) 180(20) 190(20) -52(18) 53(19) 13(18)

C(35) 180(20) 200(20) 210(20) -47(19) 43(19) -15(19)

C(36) 200(20) 160(30) 300(30) -10(20) 40(20) 8(19)

C(37) 170(30) 230(30) 380(30) 20(20) -30(20) 40(20)

C(38) 170(20) 210(30) 380(30) -30(20) 30(20) -10(20)

C(39) 150(20) 160(20) 270(30) -22(19) 44(19) 24(18)

C(40) 170(20) 190(20) 250(20) -40(20) 19(19) -30(20)

C(41) 150(20) 150(20) 290(30) 0(20) 0(20) -16(18)

C(42) 200(20) 200(20) 270(30) 10(20) 30(20) 14(19)

C(43) 300(30) 250(30) 280(30) 80(20) 70(20) -50(20)

C(44) 310(30) 190(30) 340(30) 10(20) 20(20) -60(20)

C(45) 290(30) 160(20) 270(30) -40(20) 30(20) -10(20)

C(46) 160(20) 200(20) 270(30) 10(20) 22(19) 2(18)

C(47) 170(20) 180(20) 230(20) 20(20) 9(18) -2(19)

C(48) 180(20) 180(20) 280(30) 62(19) 20(20) 5(18)

C(49) 210(30) 200(20) 260(30) 70(20) 50(20) 40(20)

C(50) 290(30) 240(30) 360(30) 70(20) 90(20) 80(20)

C(51) 240(30) 340(30) 610(40) 70(30) 170(30) 110(20)

C(52) 180(30) 350(30) 600(40) 80(30) 40(20) 0(20)

C(53) 180(20) 220(30) 390(30) 70(20) 20(20) 19(19)

C(54) 170(30) 270(30) 460(30) 30(20) -40(20) -50(20)

C(55) 250(30) 180(20) 340(30) -10(20) -20(20) -30(20)

C(56) 280(30) 220(30) 500(30) -40(20) -50(30) -70(20)

C(57) 400(30) 200(30) 440(30) -130(20) -70(30) 10(20)

C(58) 290(30) 280(30) 410(30) -110(20) 40(20) 30(20)

C(59) 230(30) 240(30) 330(30) -40(20) 30(20) -20(20)

C(60) 200(20) 190(20) 250(30) 1(19) 0(20) -1(19)

C(61) 340(30) 250(30) 280(30) -20(20) 90(20) -10(20)

C(62) 540(40) 440(40) 310(30) -10(30) 140(30) -30(30)

C(63) 480(40) 510(40) 490(40) -140(40) 130(30) 80(30)

C(64) 290(30) 150(20) 300(30) -30(20) 40(20) -30(20)

C(65) 310(30) 300(30) 350(30) -30(30) 90(30) -20(20)

C(66) 360(30) 290(30) 330(30) 20(30) 70(30) 20(30)

C(101) 330(40) 400(40) 840(50) 220(40) -50(30) -70(30)

C(100) 410(40) 290(30) 640(40) 120(30) -100(30) 10(30)

N(100) 440(30) 430(30) 900(40) 150(30) 10(30) -20(20)

______________________________________________________________________________

**Table 6. Hydrogen coordinates ( x 104) and isotropic displacement para-meters (Å2x 10** **3) for 10 (CCDC No. 141446).**

________________________________________________________________________________

x y z U**iso**

________________________________________________________________________________

H(10A) 5940(50) 8492(18) 9950(30) 100(20)

H(10B) 5340(40) 8885(18) 9330(30) 71(18)

H(10C) 5450(50) 8300(20) 9050(30) 100(20)

H(3) 5350(30) 9987(13) 6190(20) 35(13)

H(4) 5000(40) 9511(13) 5130(20) 34(13)

H(5) 5490(30) 8725(13) 5230(20) 31(12)

H(7) 5930(30) 8072(11) 5910(20) 20(11)

H(10) 4340(40) 6677(13) 6650(20) 34(12)

H(11) 6090(30) 6253(13) 6420(20) 32(12)

H(12) 7980(30) 6610(13) 6420(20) 28(12)

H(16) 7670(30) 10130(13) 6710(20) 30(14)

H(17) 8690(40) 10801(13) 6770(20) 30(14)

H(18) 8620(40) 11272(15) 7800(20) 41(15)

H(19) 7430(40) 11084(14) 8750(20) 36(14)

H(21) 5980(30) 10570(13) 9190(20) 29(12)

H(23) 4270(40) 10159(14) 9550(20) 45(14)

H(24) 2750(40) 9543(16) 9330(30) 68(18)

H(25) 2870(40) 9041(14) 8310(20) 44(14)

H(26) 4350(30) 9116(13) 7540(20) 36(13)

H(31) 8700(30) 7723(10) 7029(17) 2(9)

H(32A) 9720(40) 7007(16) 7560(30) 71(17)

H(32B) 10540(40) 7320(13) 7050(20) 29(13)

H(32C) 9950(40) 6924(13) 6700(20) 33(13)

H(33A) 8270(40) 7891(17) 5680(30) 71(17)

H(33B) 8910(30) 7375(13) 5610(20) 30(13)

H(33C) 9680(40) 7764(13) 5930(20) 26(13)

H(36) 9430(30) 6530(12) 9491(19) 20(11)

H(37) 11220(30) 6934(11) 9810(20) 19(11)

H(38) 11430(30) 7719(12) 9453(19) 27(12)

H(40) 10580(30) 8366(11) 8952(17) 10(9)

H(43) 10340(30) 9758(12) 7357(19) 17(11)

H(44) 10240(30) 10205(12) 8369(18) 17(10)

H(45) 9500(30) 9889(11) 9389(18) 8(10)

H(49) 6910(30) 7471(11) 9577(18) 16(10)

H(50) 5120(30) 7659(12) 10060(20) 22(11)

H(51) 3280(40) 7220(14) 9760(20) 45(14)

H(52) 3260(40) 6551(13) 8960(20) 38(13)

H(54) 4340(40) 6032(13) 8290(20) 35(12)

H(56) 5580(30) 5466(12) 7730(20) 26(12)

H(57) 7390(30) 5224(12) 7280(20) 23(11)

H(58) 9200(40) 5642(13) 7540(20) 32(12)

H(59) 9200(30) 6353(12) 8150(20) 28(12)

H(61) 9140(30) 8609(12) 7060(20) 27(12)

H(62A) 8570(40) 9292(15) 6300(20) 58(16)

H(62B) 9370(40) 8914(14) 5920(20) 44(14)

H(62C) 10040(40) 9370(14) 6210(20) 39(13)

H(63A) 11260(40) 8440(15) 7520(30) 56(17)

H(63B) 11650(40) 8887(16) 7070(20) 57(17)

H(63C) 11020(40) 8457(14) 6640(20) 44(15)

H(64) 8340(30) 8781(13) 9580(20) 29(12)

H(65A) 7180(30) 9444(12) 9620(20) 18(11)

H(65B) 8270(30) 9669(13) 10230(20) 31(12)

H(65C) 7480(40) 9217(13) 10430(20) 40(14)

H(66A) 10370(40) 8684(14) 10110(20) 46(14)

H(66B) 9520(40) 8810(13) 10730(20) 36(13)

H(66C) 10340(40) 9199(14) 10420(20) 43(14)

H(28) 4310 7852 6664 84

H(29A) 3374 7877 7763 43

H(29B) 4761 8026 7766 43

H(29C) 4449 7537 8064 43

H(30A) 2352 7660 6611 77

H(30B) 2715 7141 6764 77

H(30C) 3018 7382 6043 77

H(28B) 4519 7879 7062 84

H(29D) 3002 7605 7723 81

H(29E) 4361 7472 8055 81

H(29F) 3494 7102 7620 81

H(30D) 3590 7744 5890 50

H(30E) 2689 7913 6433 50

H(30F) 2707 7390 6208 50

H(20A) 9859 10486 5560 158

H(20B) 8603 10667 5783 158

H(20C) 9173 10903 5135 158

H(30D) 7176 9696 4593 100

H(30E) 8493 9466 4741 100

H(30F) 8164 9799 4066 100

________________________________________________________________________________

1. Kaschube, W.; Porschke, K. R.; Wilke, G. *Journal of Organometallic Chemistry* **1988**, *355*, 525-532. [↑](#footnote-ref-2)
2. Wang, C. M.; Friedrich, S.; Younkin, T. R.; Li, R. T.; Grubbs, R. H.; Bansleben, D. A.; Day, M. W. *Organometallics* **1998**, *17*, 3149-3151. [↑](#footnote-ref-3)
3. Dickerman, S. C.; Klein, M.; Vermont, G. B. *J. Org. Chem.* **1964**,29, (12), 3695; Nakamura, M.; Oki, M. *Bull. Chem. Soc. Jpn.* **1975**, 48, 2106-211 [↑](#footnote-ref-4)
4. Morris, G. A.; Freeman, R. *J. Magn. Res.* **1978**, *29*, 433. [↑](#footnote-ref-5)
5. Bain, A. D.; Kramer, J. A. *J. Magn. Res.* **1996**, *118A*, 21. [↑](#footnote-ref-6)
